# Supplementary material for: Monoubiquitination of ASXLs controls the deubiquitinase activity of the tumor suppressor BAP1
Source: PubMed Central journal article supplement (PMC6197237; doi:10.1038/s41467-018-06854-2), 2018-10-22
Supplement: 41467_2018_6854_MOESM1_ESM.pdf [file 41467_2018_6854_MOESM1_ESM.pdf]

## **Supplementary Information**

**Monoubiquitination of ASXLs controls the deubiquitinase activity of the tumor suppressor BAP1**

Daou et al.

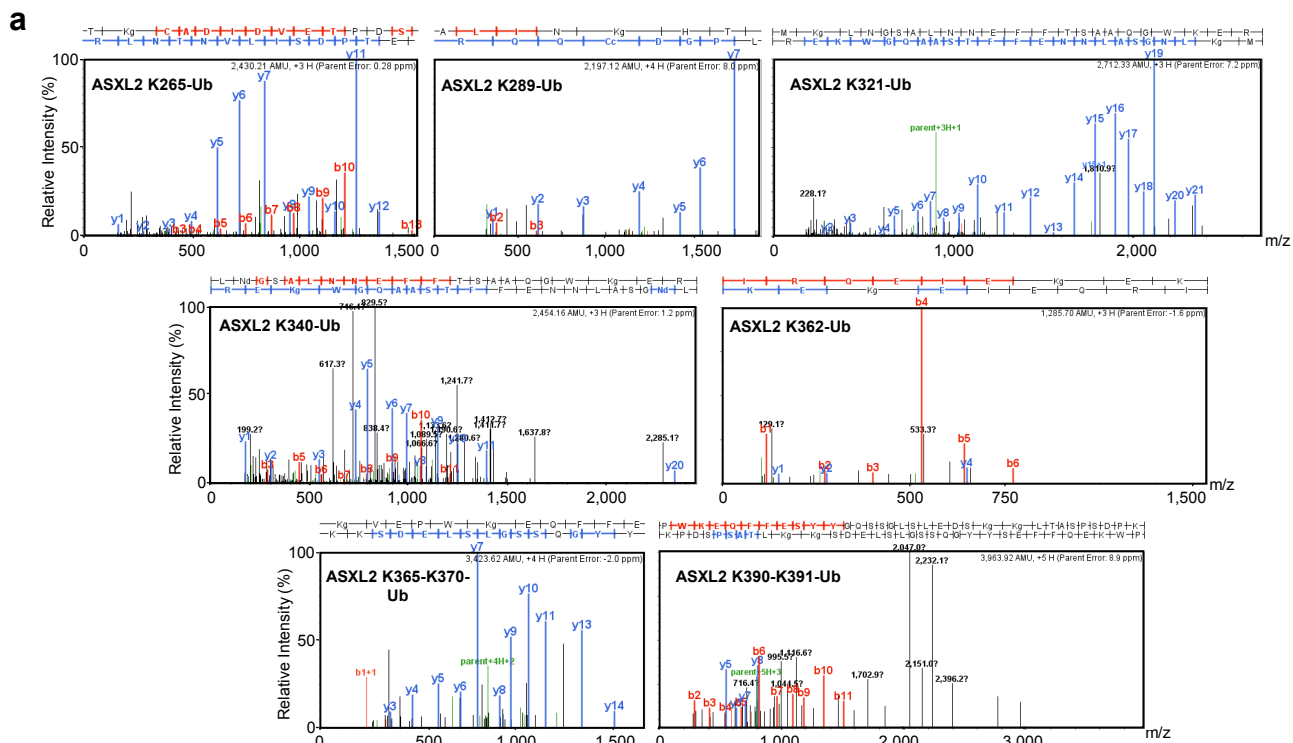

**b**

| Proteins | Ub Sites | This study                   | PhosphoSitePlus records<br>( <a href="https://www.phosphosite.org/">https://www.phosphosite.org/</a> ) |
|----------|----------|------------------------------|--------------------------------------------------------------------------------------------------------|
| ASXL2    | K265     | TKCADIVETPDSILV<br>NTNLR     |                                                                                                        |
| ASXL2    | K289     | ALINKHTFSLVPGDCQ<br>QR       |                                                                                                        |
| ASXL2    | K321     | MKLNLSALNNEFFTS<br>AAQGWER   |                                                                                                        |
| ASXL2    | K340     | LNGSAMNNEFFTSAA<br>QGWER     |                                                                                                        |
| ASXL2    | K362     | IRQEIEKEK                    |                                                                                                        |
| ASXL2    | K365     | KVPEPWKEQFFESYYG             | 24                                                                                                     |
| ASXL2    | K370     | QSSGLSLEDSSK                 | 104                                                                                                    |
| ASXL2    | K390     | PWKEQFFESYYGQSS              |                                                                                                        |
| ASXL2    | K391     | GLSLEDSSKLTASPS<br>DPK       |                                                                                                        |
| ASXL2    | K1245    |                              | 3                                                                                                      |
| ASXL2    | K1259    |                              | 2                                                                                                      |
| ASXL1    | K351     | KKVEQWKEKF                   | 55                                                                                                     |
| ASXL1    | K353     |                              | 1                                                                                                      |
| ASXL1    | K362     |                              | 3                                                                                                      |
| ASXL1    | K367     |                              | 2                                                                                                      |
| ASXL1    | K1371    |                              | 1                                                                                                      |
| ASXL1    | K1379    |                              | 2                                                                                                      |
| ASXL1    | K1419    |                              | 2                                                                                                      |
| ASXL1    | K1437    | GLSEPLEPSSLPQLS<br>IKQAFYKGL | 3                                                                                                      |
| ASXL1    | K1446    |                              | 1                                                                                                      |
| ASXL3    | K350     | EKKTEPWKEKFFERF              | 2                                                                                                      |
| ASXL3    | K352     |                              | 1                                                                                                      |

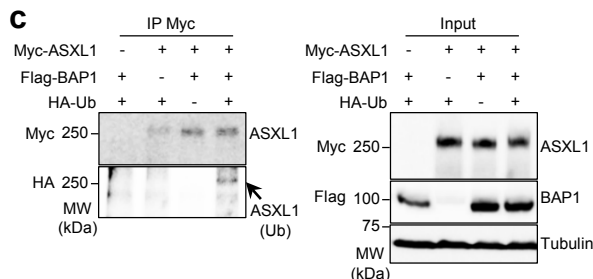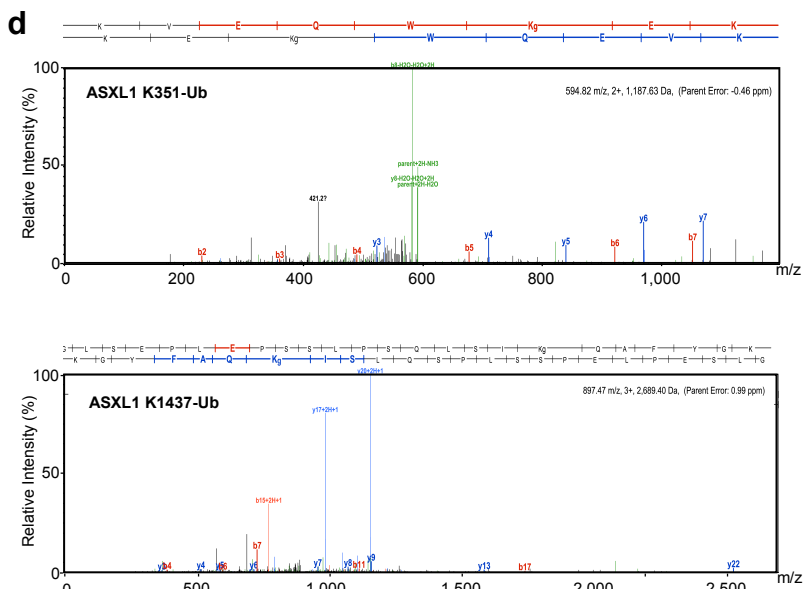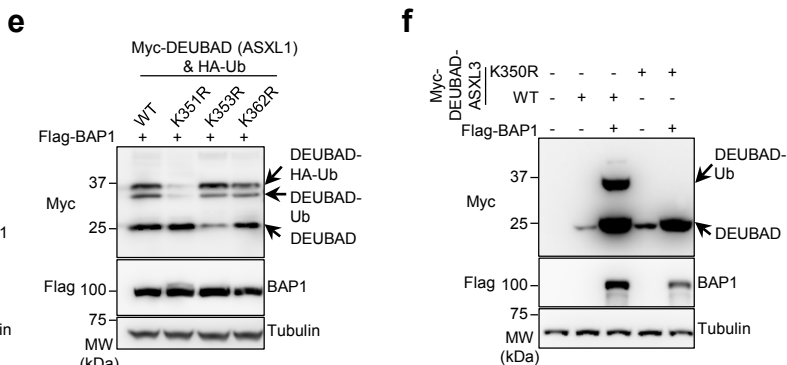

Supplementary Figure 1



### **Supplementary Figure 1. Characterization of DEUBAD monoubiquitination.**

**a** Identification of ubiquitination sites in ASXL2. HEK293T cells were transfected with Flag-ASXL2 expression vector. Flag purified ASXL2 from total extracts was analyzed by mass spectrometry (MS). MS/MS spectra of ASXL2 ubiquitinated lysine residues are indicated. The modified lysine residues by the C-terminal Gly-Gly fragment of ubiquitin are indicated as Kg. n=1 biological sample. **b** Summary of ASXL1, ASXL2 and ASXL3 ubiquitination sites identified in this study and others. Number of records of the corresponding ubiquitination sites were extracted from PhosphoSitePlus. **c** Myc-ASXL1 was co-transfected in HEK293T cells with and without Flag-BAP1 or HA-Ub and immunoprecipitation with Myc antibody was performed to analyze ASXL1 ubiquitination as indicated. n=3 independent biological replicates. **d** Identification of ubiquitination sites in ASXL1. HEK293T cells were transfected with expression vector for Flag-ASXL1. ASXL1 was purified for MS analysis. MS/MS spectra indicating Ub remnant on K351 and K1437. The modified lysine residues within the peptide were indicated as described above. n=1 biological sample. **e** Lysine 351 is the BAP1-dependent monoubiquitination site of ASXL1. HEK293T cells were transfected as indicated with Myc-DEUBAD constructs for ASXL1 and cell lysates were used for western blotting. n=3 independent biological replicates. **f** ASXL3 is ubiquitinated on its DEUBAD on K350 in BAP1-dependent manner. HEK293T cells were transfected with Myc-DEUBAD (ASXL3) or Myc-DEUBAD (ASXL3) K350R with or without Flag-BAP1 and DEUBAD monoubiquitination was analyzed as indicated. Note that ASXL3 DEUBAD is highly stabilized in the presence of BAP1. n=2 biological sample. Tubulin was used as a loading control for panels **c**, **e** and **f**.



**Supplementary Figure 2. Monoubiquitination of DEUBAD is conserved in *Drosophila*.**

**a** *Drosophila* Asx is monoubiquitinated in Calypso-dependent-manner. Myc-V5-Asx was transfected with and without Flag-Calypso in S2 cells. Note the Asx band upper shift suggestive of its modification in the presence of Calypso. n=3 biological replicates. **b** *Drosophila* DEUBAD K325 is monoubiquitinated in Calypso-dependent-manner. Myc-V5-DEUBAD (Asx) and its K325R mutant constructs were co-transfected with and without Calypso expression constructs in S2 cells. The cells were then harvested for western blotting analysis. n=3 biological replicates. **c** *Drosophila* DEUBAD is ubiquitinated in human cells. HEK293T cells were transfected with either Flag-BAP1 or Flag-Calypso along with Flag-DEUBAD (Asx) or Flag-DEUBAD (Asx) K325R and harvested for immunoblotting analysis as indicated. n=2 biological replicates. **d** Calypso promotes DEUBAD ubiquitination in human cells. HEK293T cells were transfected with either Flag-BAP1 or Flag-Calypso along with Myc-DEUBAD (ASXL2) or Myc-DEUBAD (ASXL2) K370R and harvested for immunoblotting analysis as indicated. n=2 biological replicates. **e** K370 of ASXL2 DEUBAD is not conserved in RPN13 or INO80G DEUBADs. Multiple sequence alignment of the DEUBAD domains of ASXL2, RPN13 and INO80G. The K370 of ASXL2, including its peptide sequence context, is not found in RPN13 or INO80G DEUBADs. The K370 is highlighted in purple. **f** UCH37 does not promotes RPN13 or INO80G DEUBAD monoubiquitination. HEK293T cells were transfected with either Myc-DEUBAD (RPN13) or Myc-DEUBAD (INO80G) with and without Flag-UCH37 or its catalytic dead mutant (C88A). Cells were harvested for immunoblotting analysis as indicated. The star indicates a non-specific band. n=3 biological replicates. Tubulin was used as a loading control for panels **c**, **d** and **f**. Histone H3 was used as a loading control for panels **a**, **b**.



**Supplementary Figure 3. ASXL2 stability is regulated by the proteasome and deubiquitination.**

**a** Monoubiquitinated ASXL2 is very stable comparatively to the unmodified form. U-2 OS cells stably expressing control empty vector or HA-ASXL2 were treated with cycloheximide (CHX) for the indicated times and harvested for immunoblotting analysis. The arrows indicate the non-modified and the monoubiquitinated form of ASXL2. The star indicates a non-specific band. n=2 biological replicates. **b** DUB siRNA screen identifies potential regulators of DEUBAD ubiquitination. U-2 OS cells stably expressing Flag-HA-BAP1 and GFP-DEUBAD (ASXL2) were transfected with an siRNA library for human deubiquitinases assembled from individual siRNAs provided by Sigma (see **Supplementary Table 1**). Cell extracts were used for immunoblotting. The black dots indicate the siRNA for BAP1, PSMD14 and PSMD7. n=1 biological replicate. YY1 was used as a loading control for panels **a** and **b**.

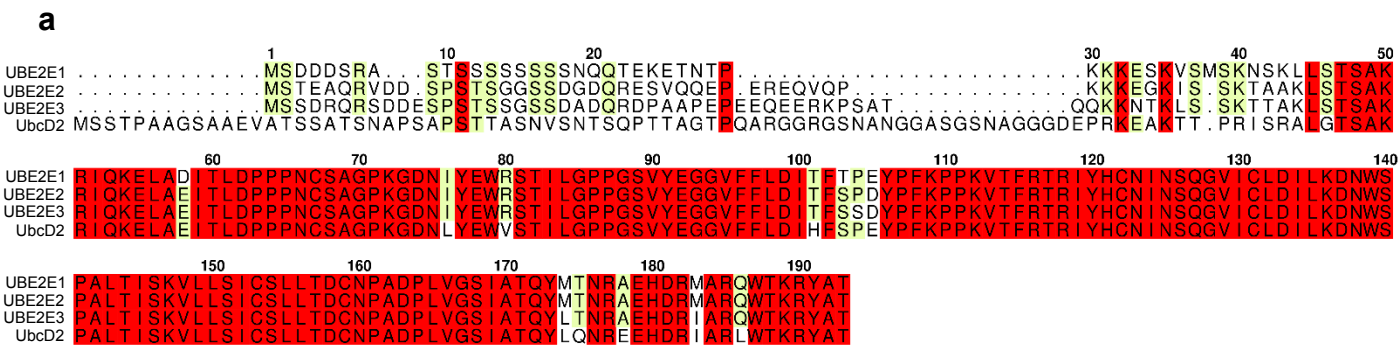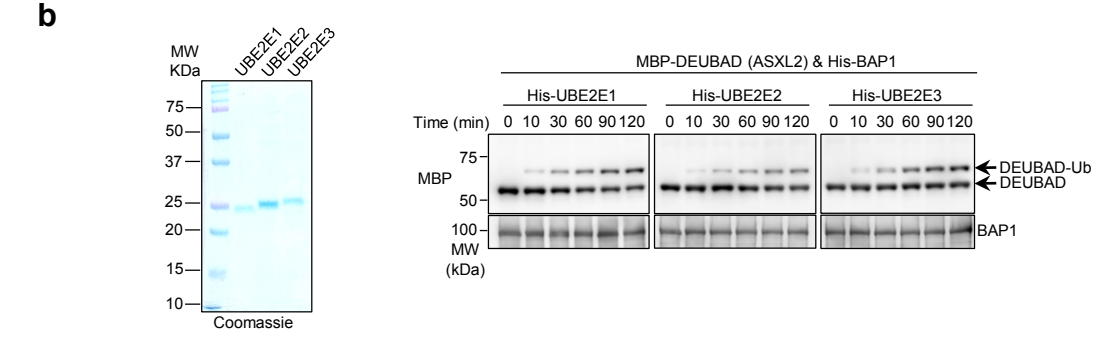

### Supplementary Figure 4

**Supplementary Figure 4. UBE2E Ub-conjugating enzymes catalyze DEUBAD monoubiquitination.**

**a** Alignment of human UBE2E1, UBE2E2 and UBE2E3 sequences with *Drosophila* UbcD2. **b** UBE2E1, UBE2E2 and UBE2E3 catalyze DEUBAD ubiquitination *in vitro*. Left panel, analysis of UBE2E1, UBE2E2 and UBE2E3 proteins using coomassie blue staining. His-tagged human UBE2E2 and UBE2E3 proteins were purified from bacteria and recombinant His-UBE2E1 was from Boston Biochem. Right panel, bacteria purified His-BAP1/MBP-DEUBAD (ASXL2) complex was incubated with recombinant His-tagged UBE2E1 or UBE2E2 or UBE2E3 enzymes for *in vitro* ubiquitination assays for the indicated times. The reactions were stopped at the indicated time points and analyzed by immunoblotting. n=2 biological replicates.



### Supplementary Figure 5. UBE2E3 regulates DEUBAD stability.

**a** E2 ubiquitin-conjugating siRNA screen identifies potential regulators of DEUBAD ubiquitination. U-2 OS cells stably expressing GFP-DEUBAD (ASXL2) were transfected with siRNA library for all human E2s and DEUBAD protein levels were analyzed by western blotting. n=1 biological replicate. **b** UBE2E3 is the only E2 whose depletion significantly increases the levels of the non-modified form of DEUBAD (ASXL2). Densitometry analysis of the indicated protein bands in E2s siRNAs versus siRNA control. **c** UBE2O overexpression does not affect DEUBAD ubiquitination. HEK293T cells were transfected with expression vectors for Myc-DEUBAD (ASXL2), Flag-BAP1 and HA-Ub with or without Myc-UBE2O or Myc-UBE2O catalytic dead (CD). Cells were harvested for immunoblotting analysis. n=2 biological replicates. **d** UBE2O depletion does not affect ASXL2 stability. U-2 OS cells were transfected with Non-target (NT) control siRNA as well as UBE2O siRNA and were harvested for immunoblotting analysis as indicated. n=3 biological replicates. **e** Effects of UBE2E1 or UBE2E2 depletion on DEUBAD stability. U-2 OS cells stably expressing either GFP-DEUBAD (ASXL2) or GFP-DEUBAD (ASXL2) K370R were transfected with Non-target siRNA control or siRNA for UBE2E1 or UBE2E2 and then treated with CHX for the indicated times. Cell lysates were used for immunoblotting. Densitometry analysis of DEUBAD protein levels was conducted and presented for each siRNA condition. The star indicates UBE2E2 band detected with UBE2E1 antibody. Error bars represent **s.d** (mean  $\pm$  SD). n=3 biological replicates. YY1 was used as a loading control for panel **a**. Tubulin was used as a loading control for panels **d** and **e**.



**a**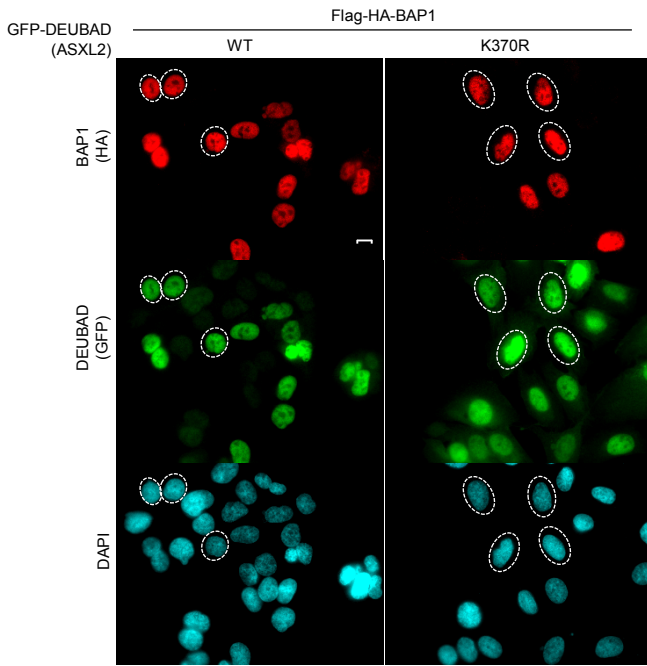**b**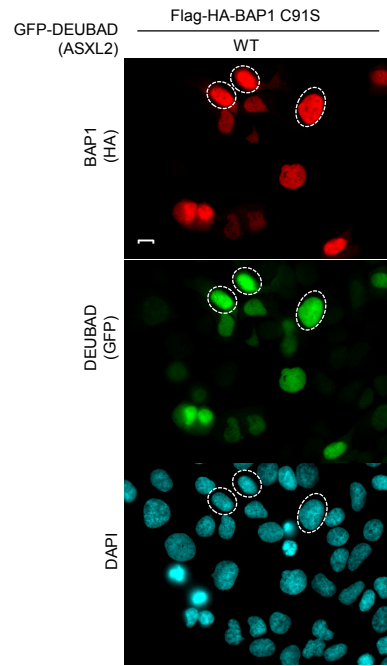**c**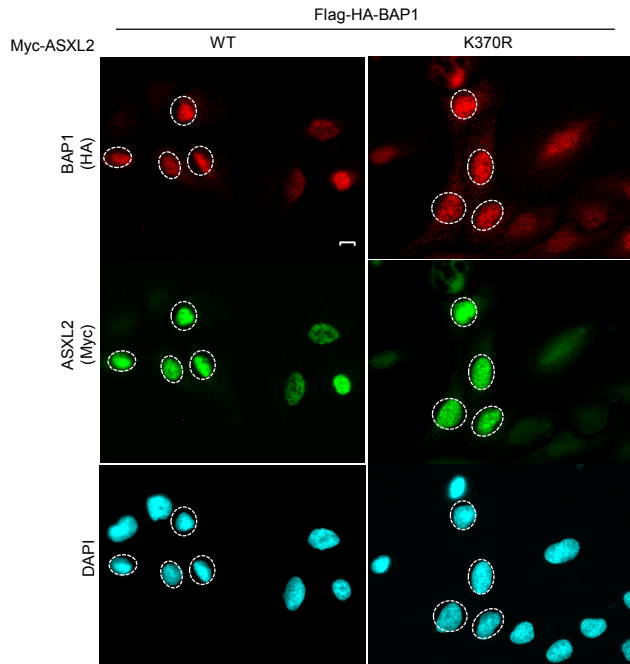**Supplementary Figure 6**

**Supplementary Figure 6. Expression levels of DEUBAD (ASXL2) and ASXL2 or their corresponding mutants in the presence of BAP1.**

**a-c** U-2 OS cells stably expressing Flag-HA-BAP1 or Flag-HA-BAP1 C91S were transduced with lentivirus expressing constructs for either GFP-DEUBAD (ASXL2) or GFP-DEUBAD (ASXL2) K370R (**a, b**) or Myc-ASXL2 WT or Myc-ASXL2 K370R (**c**) and harvested for immunostaining analysis. The encircled cells co-express the different forms of BAP1 with the corresponding forms of ASXL2 proteins. GFP DEUBAD (ASXL2) (green), Myc-ASXL2 (green), HA-BAP1 (red), DAPI (blue). Note that DEUBAD or ASXL2 and BAP1 are generally co-stabilized when co-expressed together. Scale bars: 15  $\mu$ m. n=3 biological replicates.

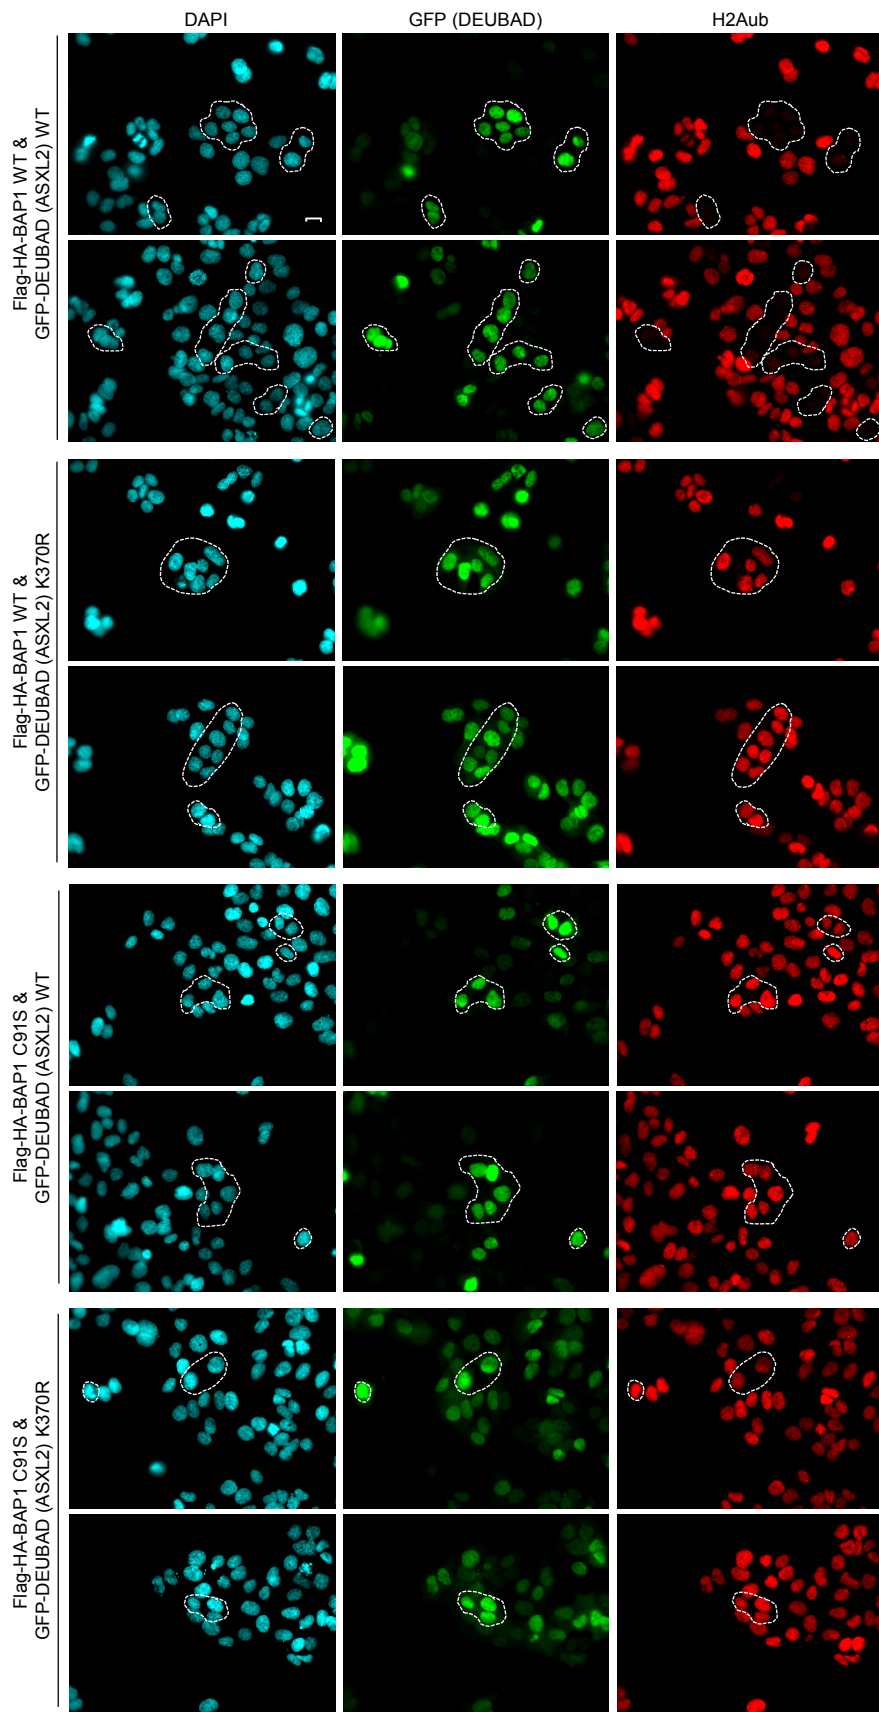

Supplementary Figure 7

**Supplementary Figure 7. DEUBAD monoubiquitination promotes BAP1 DUB activity**

U-2 OS cells stably expressing Flag-HA-BAP1 or Flag-HA-BAP1 C91S were transduced with lentivirus expressing constructs for either GFP-DEUBAD (ASXL2) or GFP-DEUBAD (ASXL2) K370R and harvested for H2Aub levels analysis by immunostaining. GFP DEUBAD (ASXL2) (green), GFP DEUBAD (ASXL2) K370R (green), H2Aub (red), DAPI (blue). Selected cells showing either decrease or no change of H2Aub levels were encircled. Scale bars: 20  $\mu$ m. n=3 biological replicates.

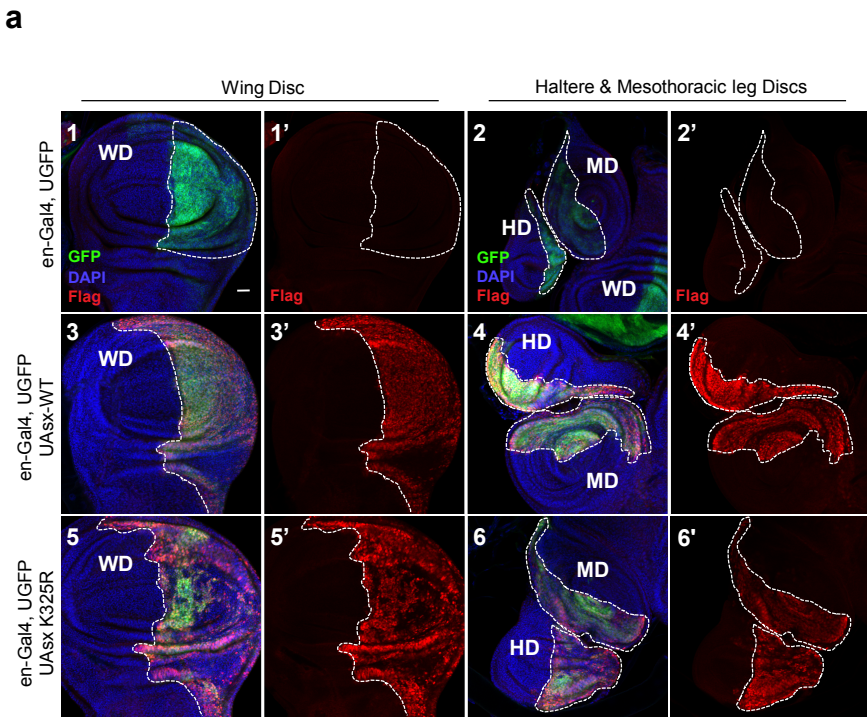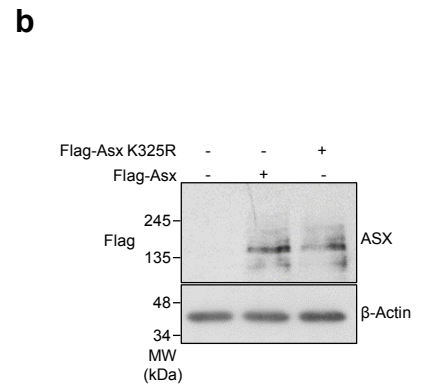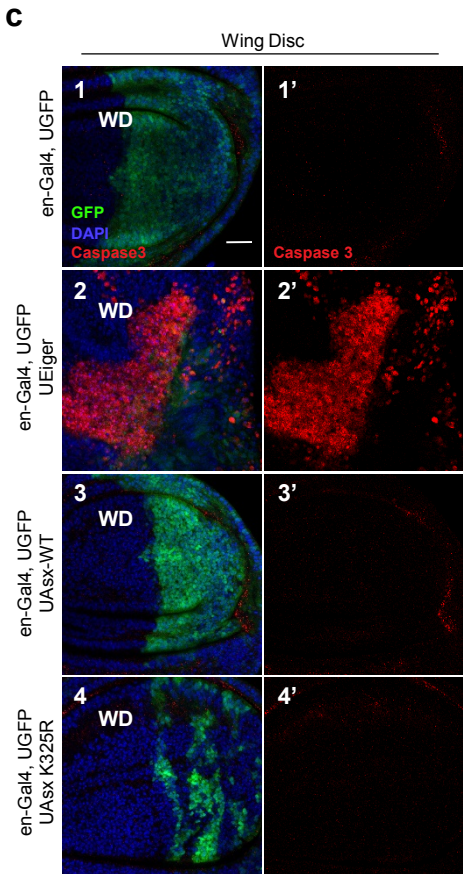

Supplementary Figure 8

**Supplementary Figure 8. *Drosophila* Asx WT or K325R are expressed at similar levels in *Drosophila* tissues**

**a** Immunostaining showing the expression levels of Asx WT or Asx K325R (Flag) during larval disc development. Imaginal discs were stained with anti-Flag (red) for Asx expression and DAPI (blue) for nuclei. GFP staining indicates the expression pattern of *en-Gal4*. The genotypes are indicated. WD: Wing imaginal disc, HD: Haltere imaginal disc; MD: Mesothoracic leg imaginal disc. Scale bars: 20  $\mu$ m. n=3 biological replicates. **b** Immunoblot showing the expression levels of Asx WT or Asx K325R (Flag) in whole larva extracts. Ubiquitous expression was achieved through the use of the ubiquitin-Gal4 driver. Actin was used as a loading control. **c** Overexpression of Asx (WT or K325R) does not induce apoptosis during wing development. Apoptotic cells were stained for cleaved caspase-3. Expression of Eiger was conducted as a positive control for cleaved caspase-3 staining. The genotypes are indicated. GFP and DAPI staining were performed as indicated above. Scale bars: 20  $\mu$ m. n=2 biological replicates.

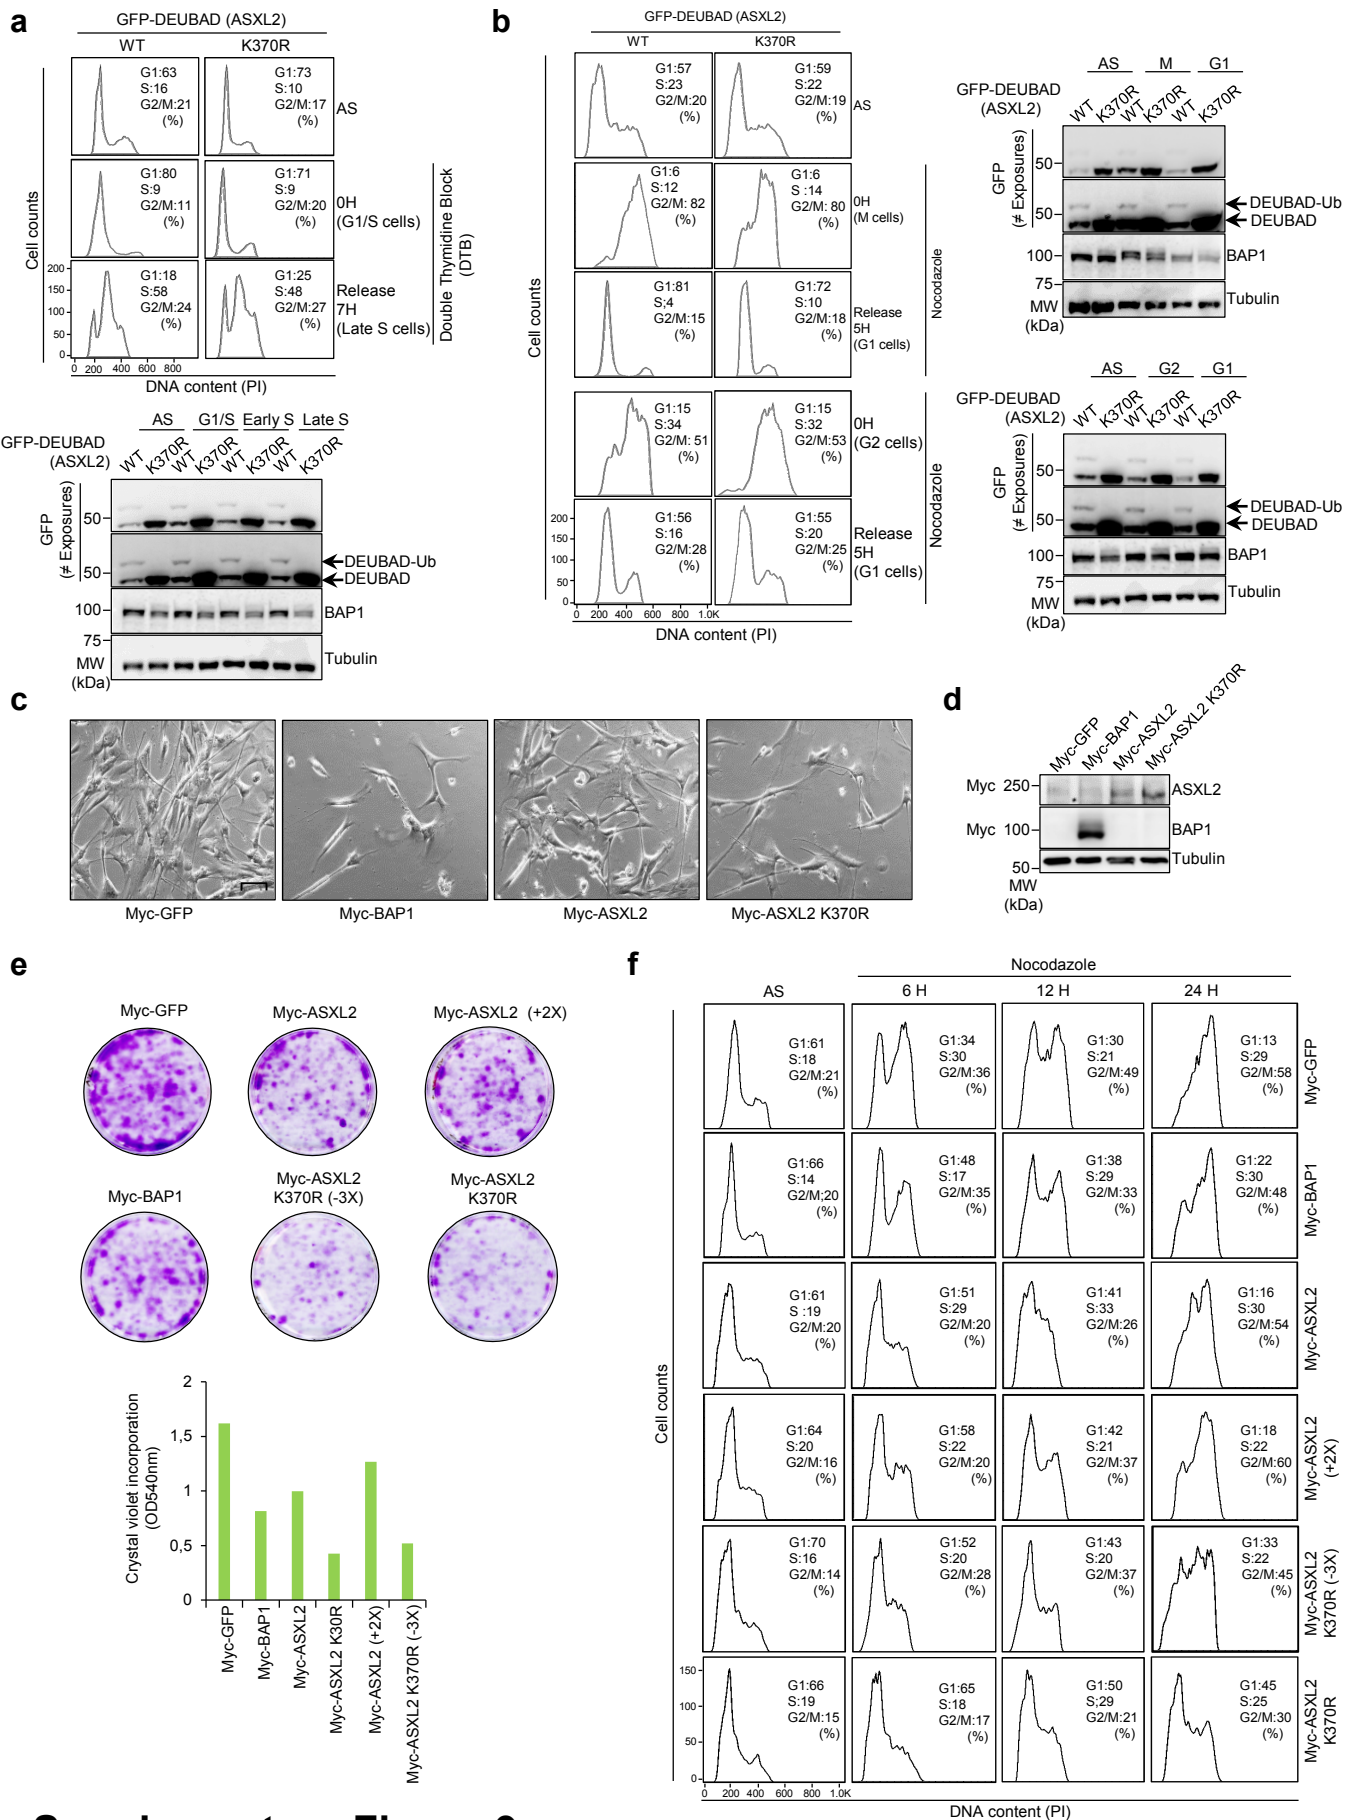

Supplementary Figure 9

## **Supplementary Figure 9. Expression of ASXL2 K370R reduces mammalian cell proliferation**

**a-b** DEUBAD of ASXL2 is constitutively monoubiquitinated during cell cycle progression. U-2 OS cells stably expressing Flag-HA-BAP1 were transduced with either GFP-DEUBAD (ASXL2) or GFP-DEUBAD (ASXL2) K370R and synchronized in different phases of the cell cycle. Cells were arrested in G1/S by double thymidine block then released for 7 hours and cell cycle progression was analyzed by FACS (**a**). Cells were also treated with nocodazole to induce M arrest. Cells were harvested at the indicated times post-release for FACS analysis (**b**). DEUBAD monoubiquitination levels and BAP1 protein levels were evaluated by immunoblotting. n=2 biological replicates. **c-d** Human primary fibroblasts (LF1) were transduced with lentiviral control or BAP1 or ASXL2 or ASXL2 K370R lentiviral expression vectors. Equal numbers of cells were either plated and phase contrast pictures were taken (**c**) or harvested for protein expression analysis (**d**). n=3 biological replicates. **e-f** 3T3L1 mouse preadipocytes cells were transduced with different amounts of BAP1, ASXL2 WT or K370R lentivirus particles and equal numbers of cells were either plated for crystal violet staining (**e**) or treated with nocodazole and collected for FACS analysis as indicated (**f**). Note that (+2X) refers to transduction of cells with twice the amount of viruses culture media we normally use for Myc-ASXL2, and (-3X) refers to transduction of the cells with three times less the amount of viruses culture media we normally use for ASXL2 K370R. This adjustment was conducted to correct for the expression levels usually higher for ASXL2 K370R. As: Asynchronous cell population. n=2 biological replicates. Tubulin was used as a loading control for panels **a**, **b** and **d**.



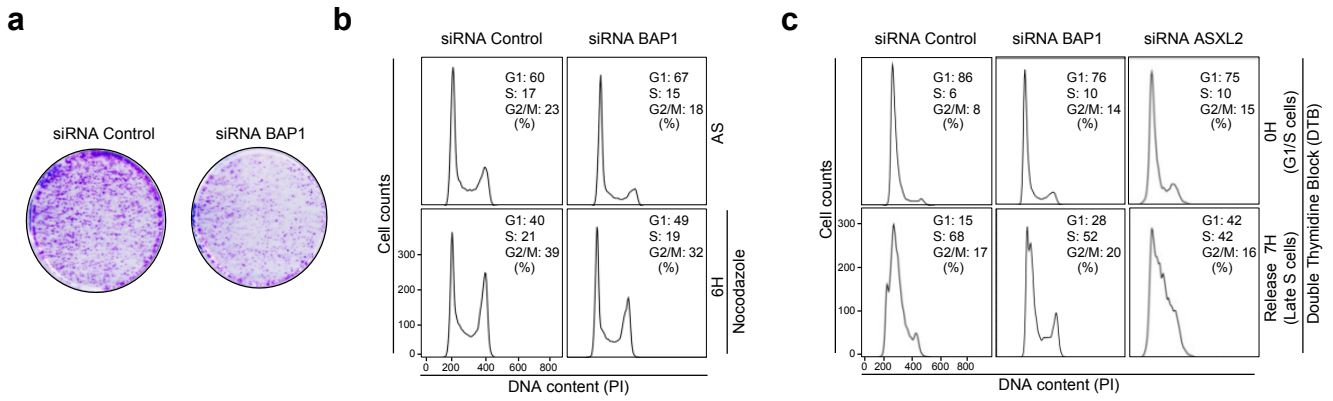

## Supplementary Figure 10

### Supplementary Figure 10. BAP1 depletion reduces cell proliferation.

**a-c** U-2 OS cells were transfected with NT siRNA control or siRNA for BAP1. Equal number of cells were plated for colony formation assay (**a**) or treated with nocodazole for FACS analysis (**b**). Equal number of U-2 OS cells transfected with NT siRNA control or siRNA for BAP1 or ASXL2 were subjected to double thymidine block as indicated, and cell cycle progression was analyzed by FACS following release from S-phase block (**c**). n=3 biological replicates.

**a**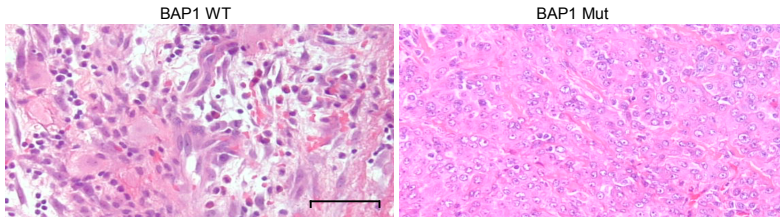**b**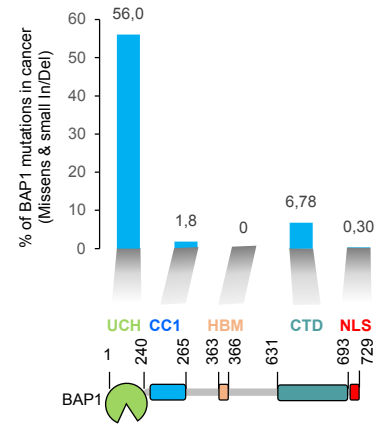**c**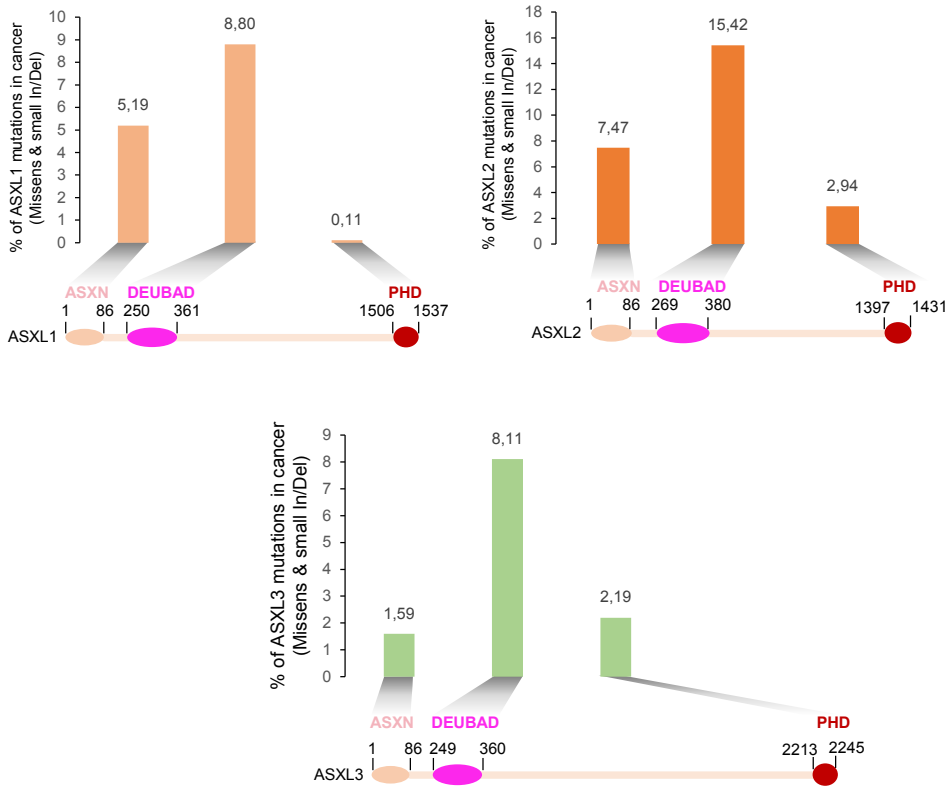

## Supplementary Figure 11

### Supplementary Figure 11. Cancer-associated mutations of BAP1 and ASXLs.

**a** Haemotoxylin and Eosin staining of mesothelioma biopsies corresponding to **Figure 9j**. Images were taken at 100X magnification. Scale bars: 100  $\mu$ m. **b-c** Schematic representation of BAP1 (**b**) and ASXLs (**c**) showing cancer mutations frequencies among their functional domains. Data integrating multiple cancer types was compiled from C-Bioportal database. Note that only missense mutations and small in-frame insertions/deletions were considered.

**Supplementary Figure 12.** Uncropped immunoblots used for the indicated proteins in the **Figure 1**

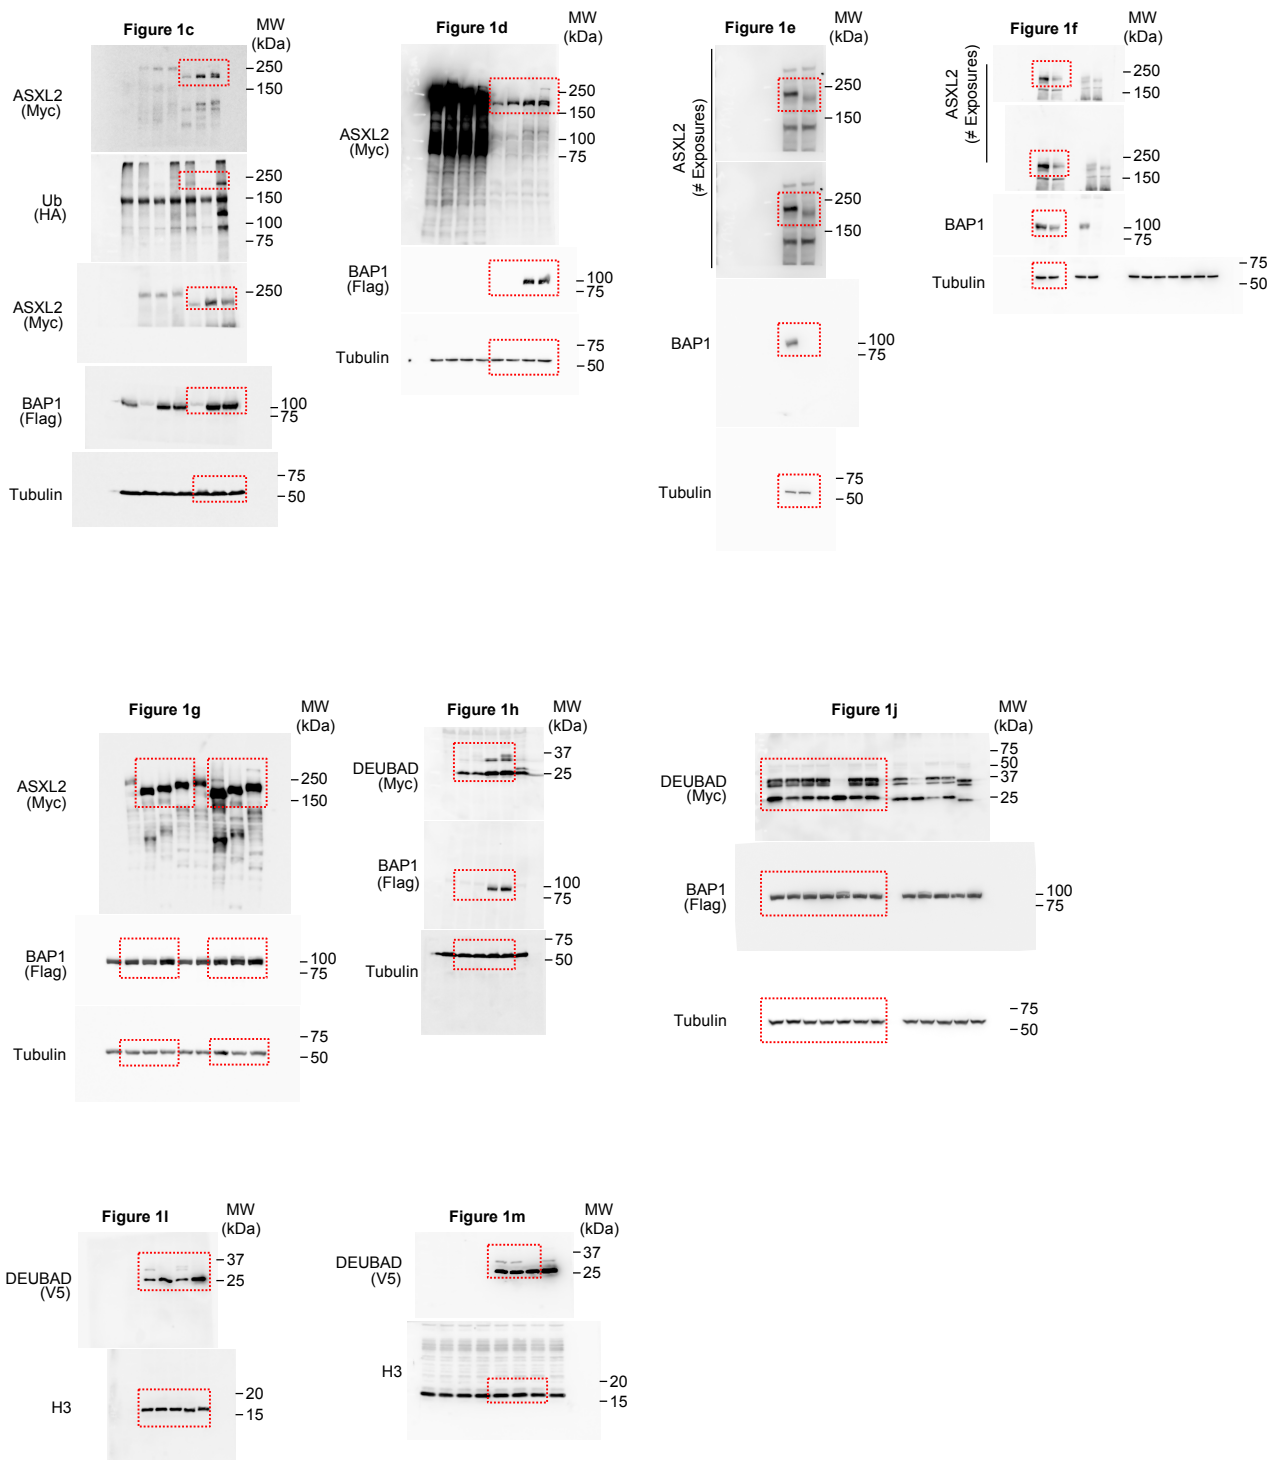

**Supplementary Figure 13.** Uncropped immunoblots used for the indicated proteins in the **Figure 2**

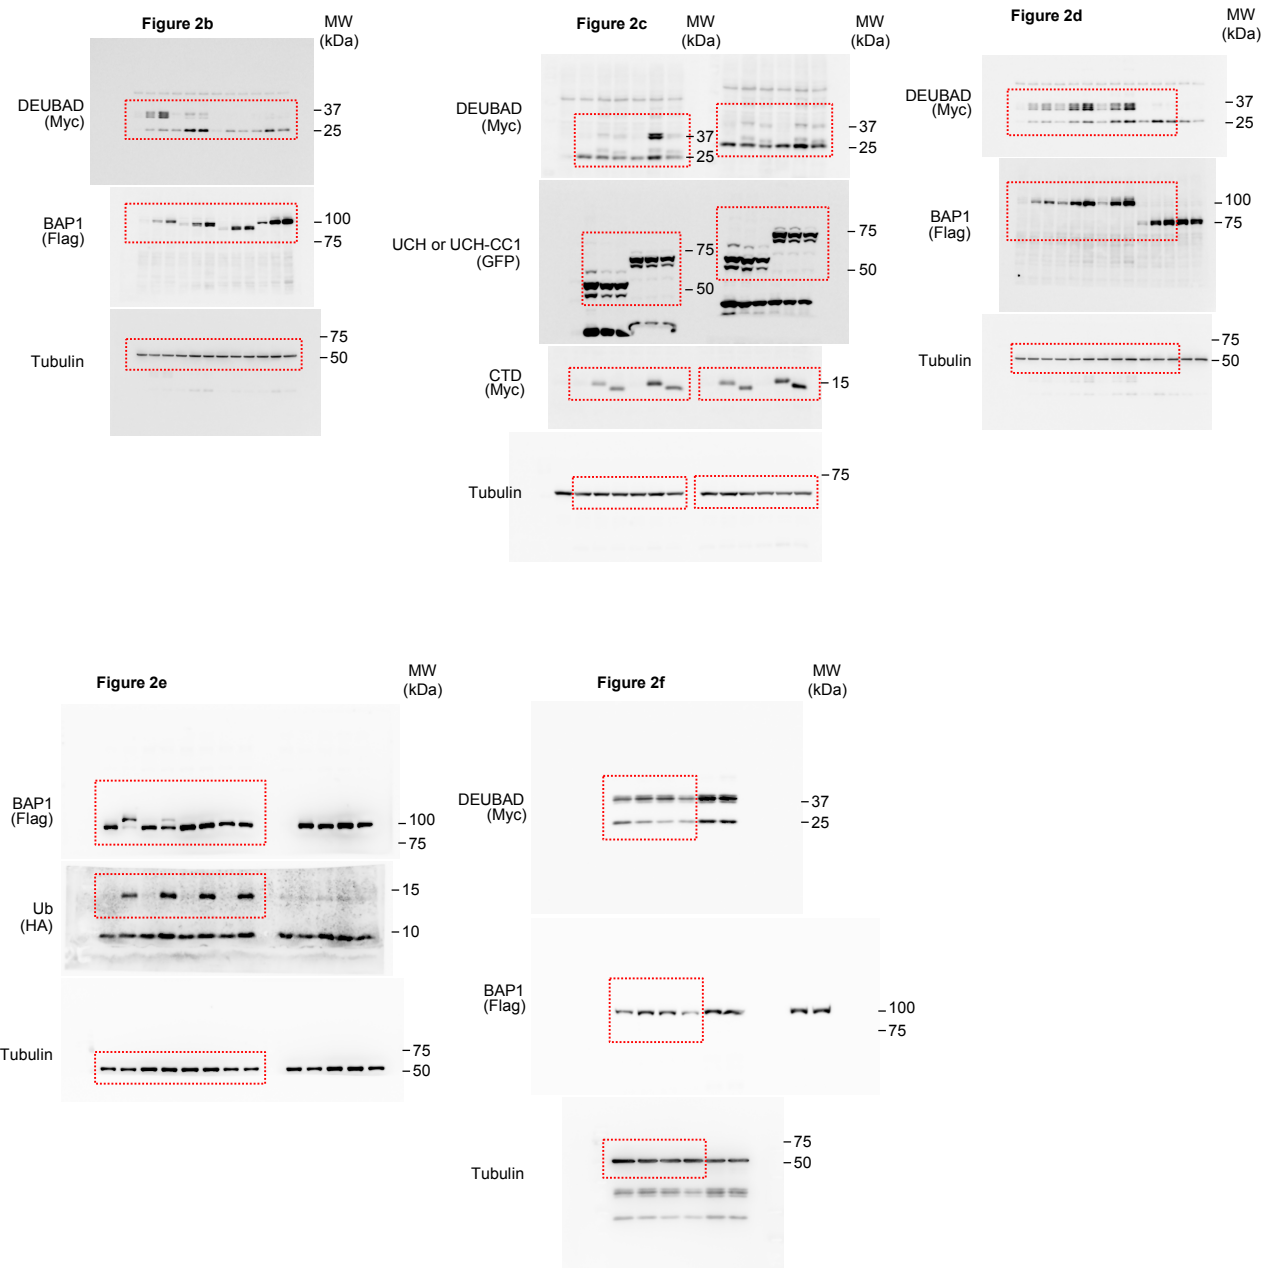

**Supplementary Figure 14.** Uncropped immunoblots used for the indicated proteins in the **Figure 3**

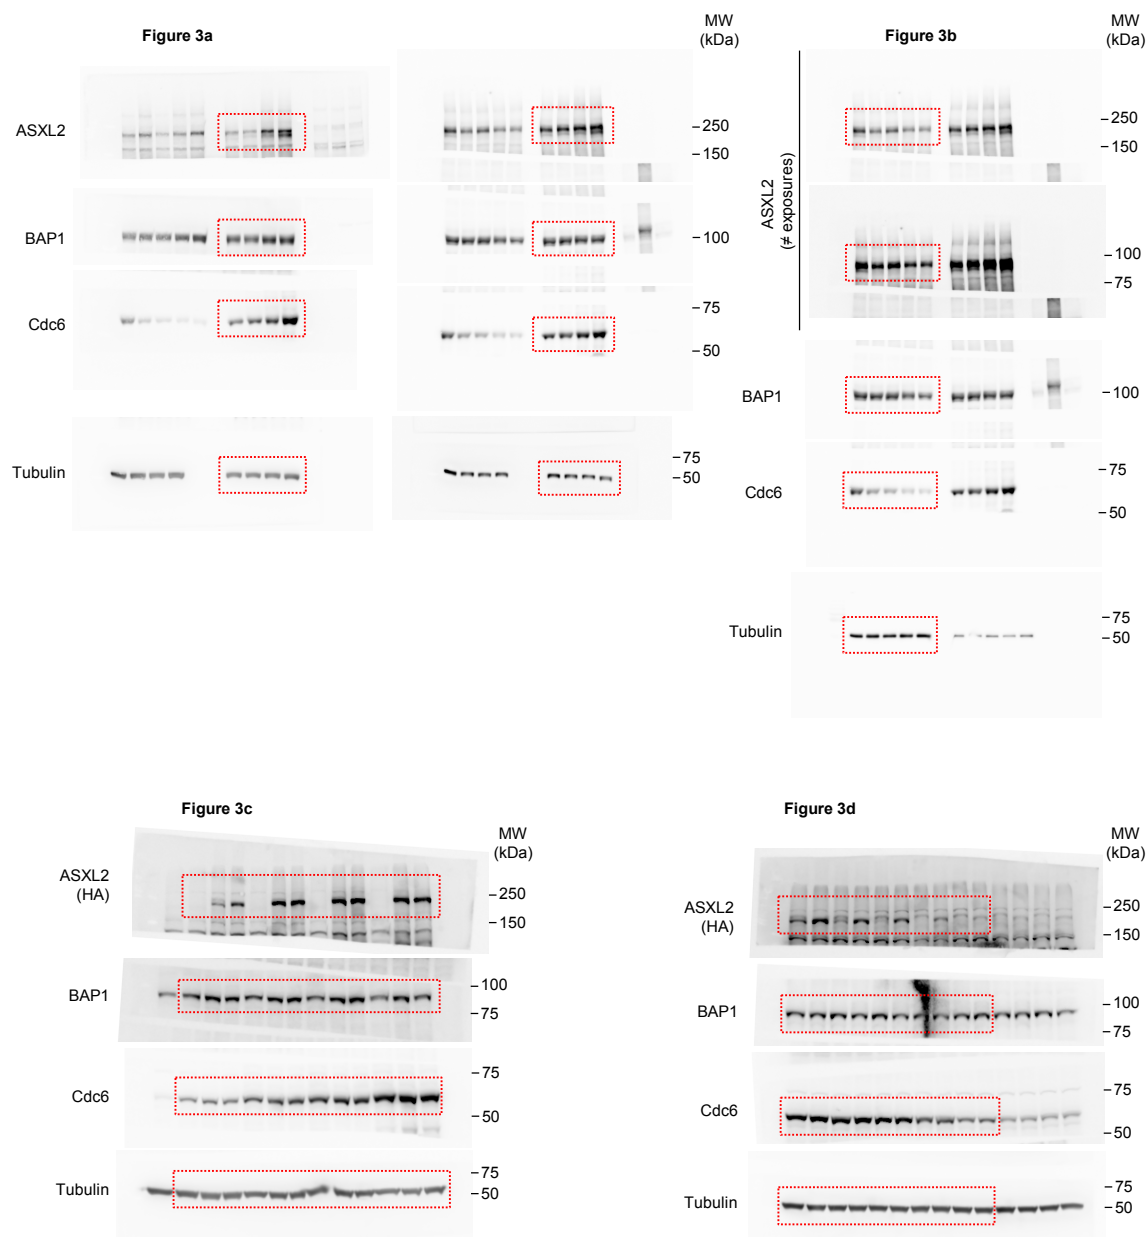

**Supplementary Figure 15.** Uncropped immunoblots used for the indicated proteins in the **Figure 3**

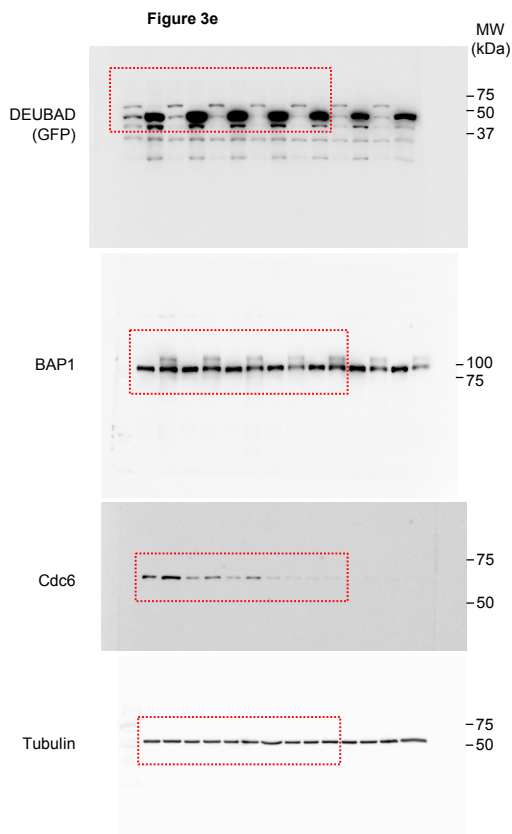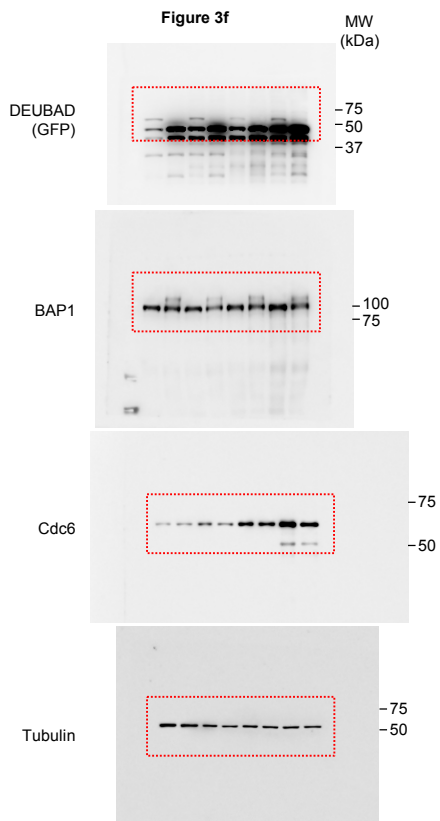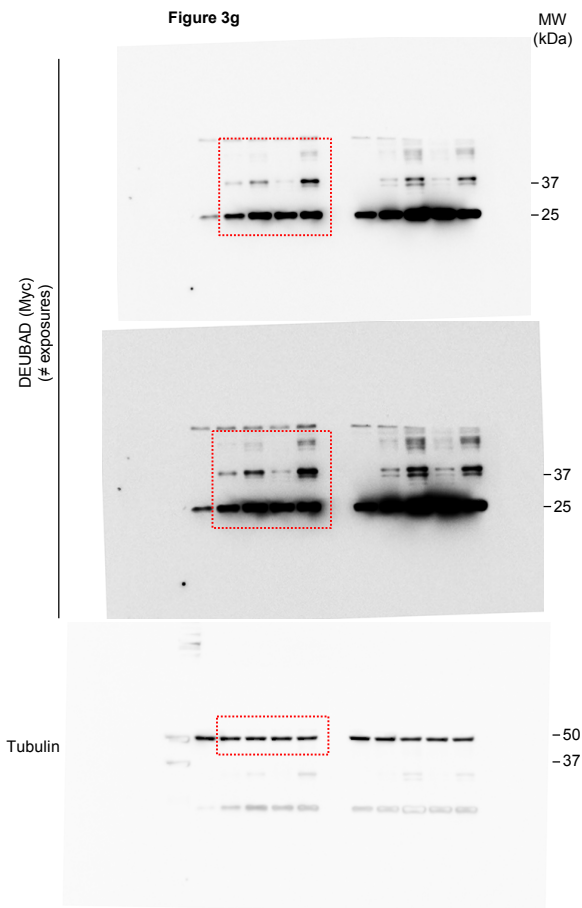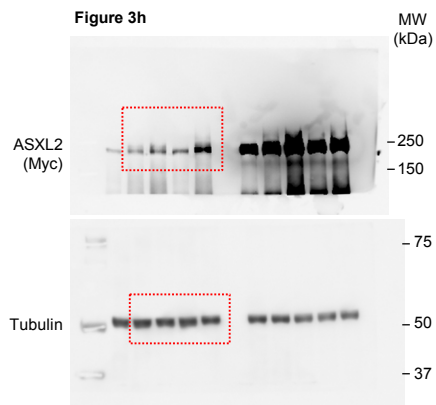

**Supplementary Figure 16.** Uncropped immunoblots used for the indicated proteins in the **Figure 4**

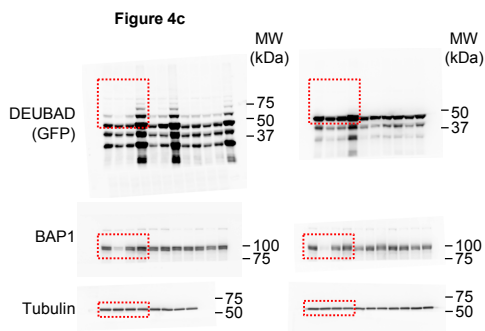

**Supplementary Figure 17. Uncropped immunoblots used for the indicated proteins in the Figure 5**

**Figure 5a**

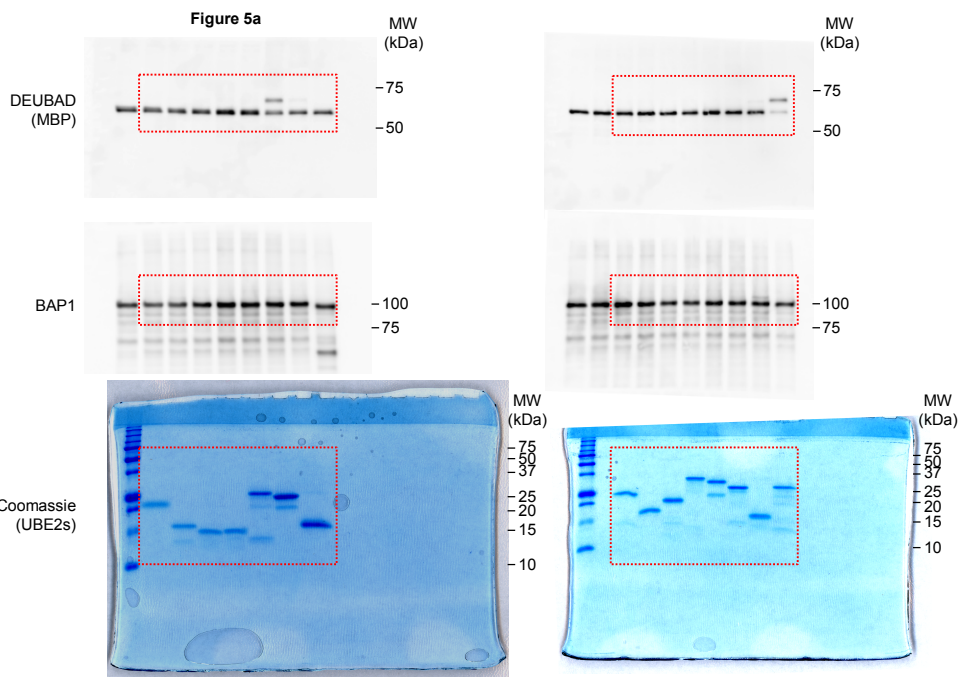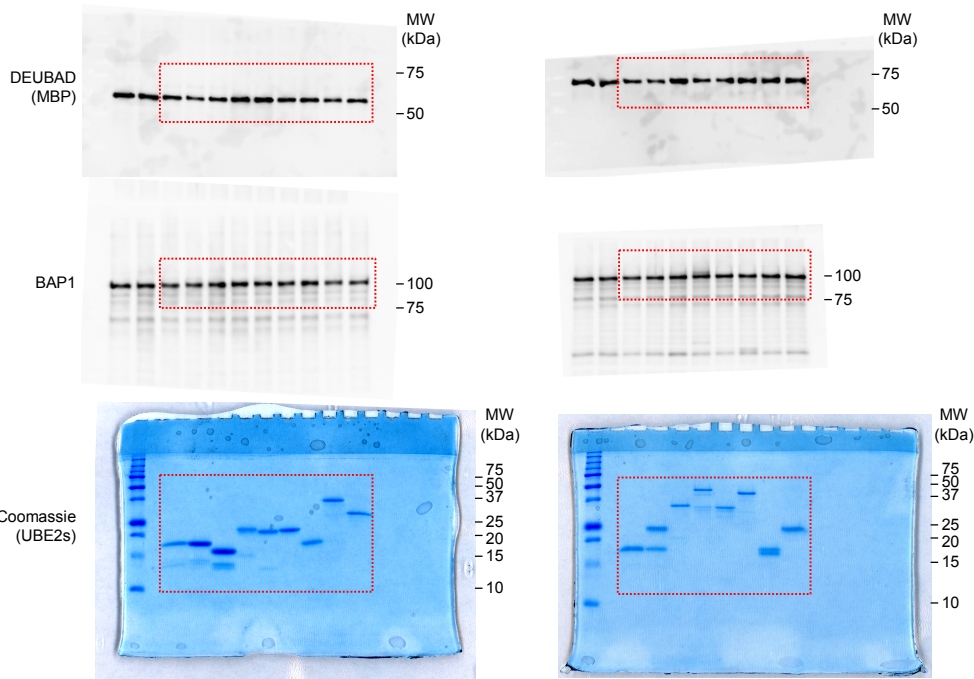



**Supplementary Figure 18.** Uncropped immunoblots used for the indicated proteins in the **Figure 5**

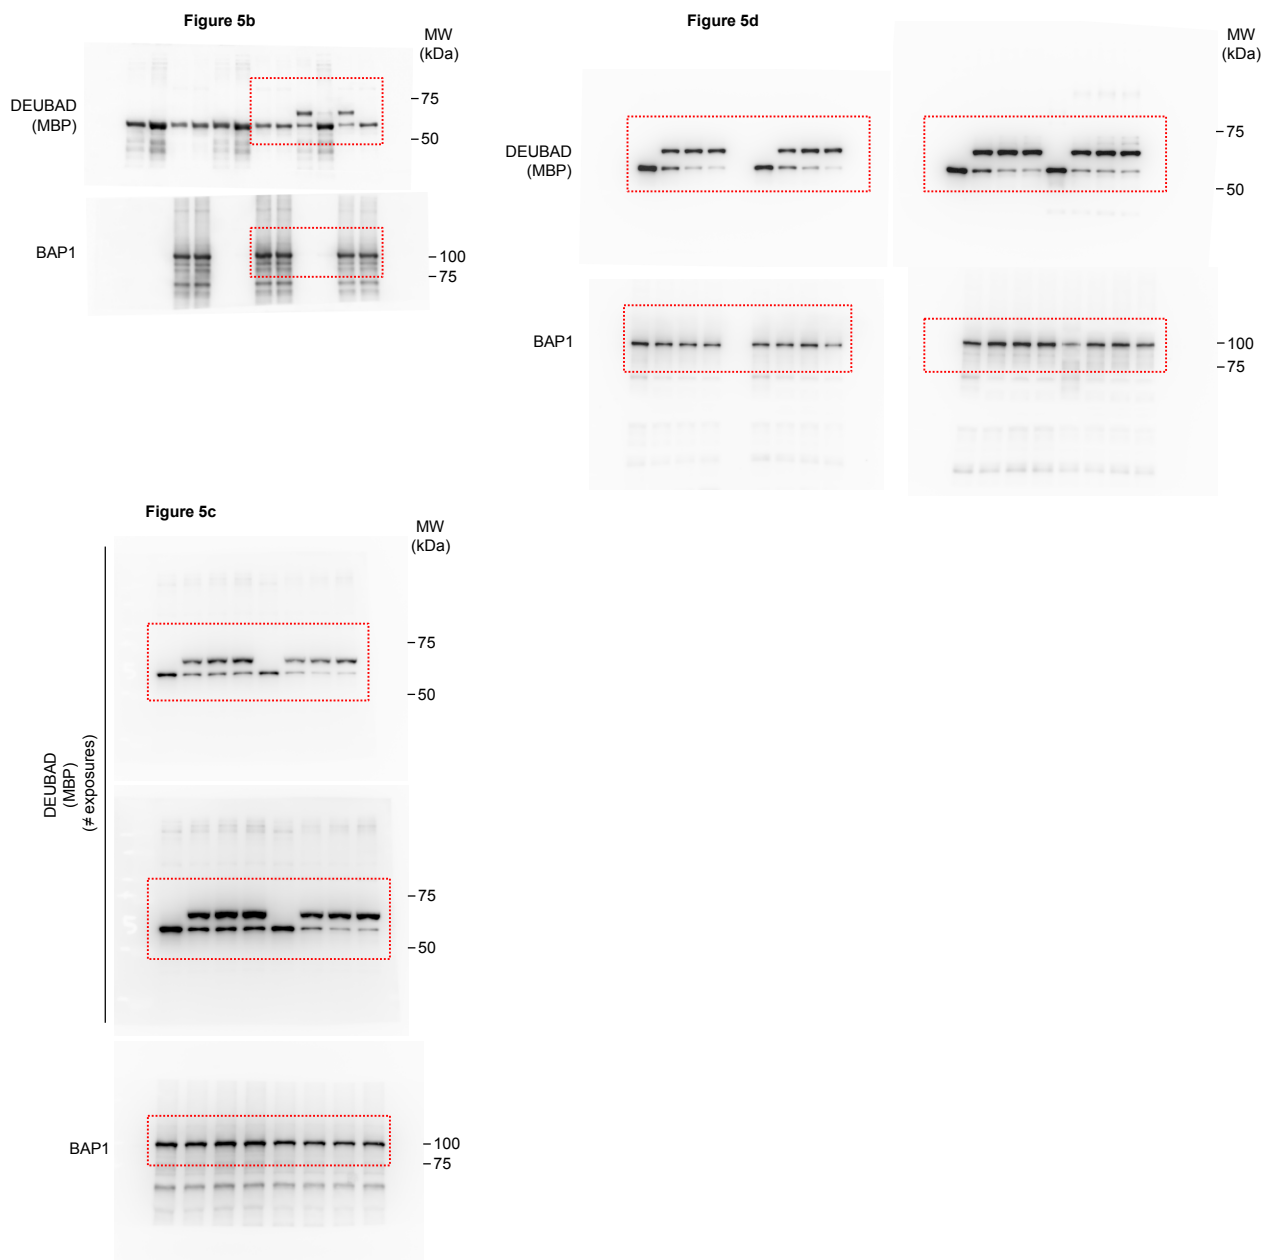

**Supplementary Figure 19.** Uncropped immunoblots used for the indicated proteins in the **Figure 6**

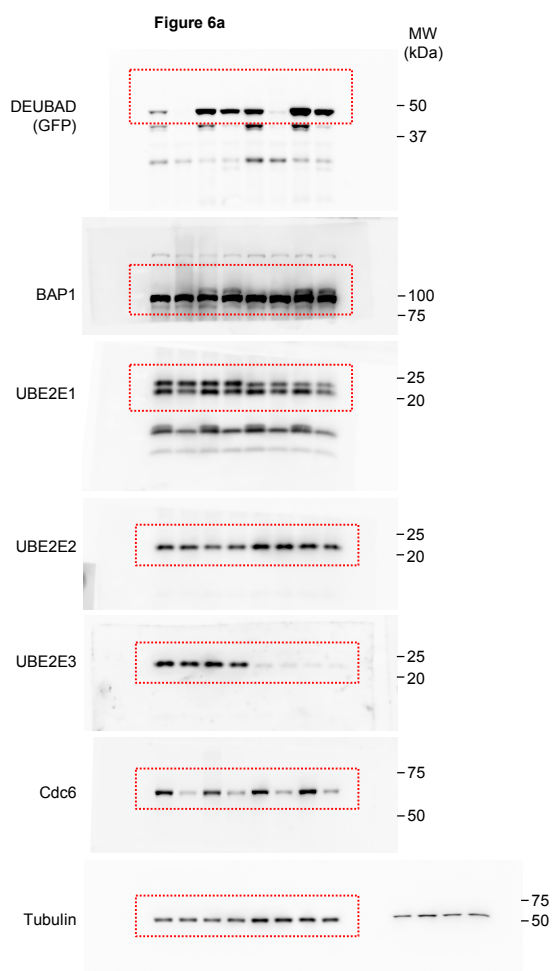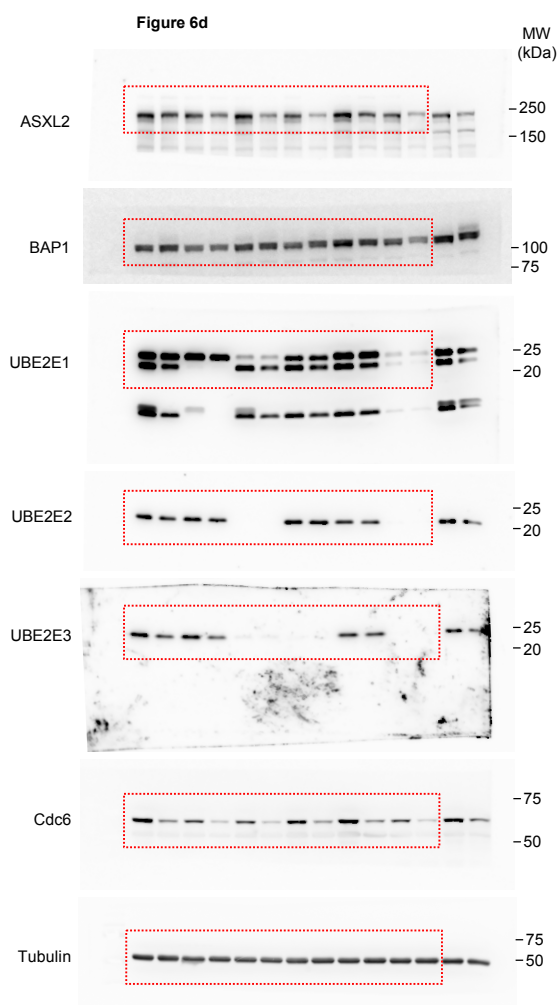

**Supplementary Figure 20.** Uncropped immunoblots used for the indicated proteins in the **Figure 6**

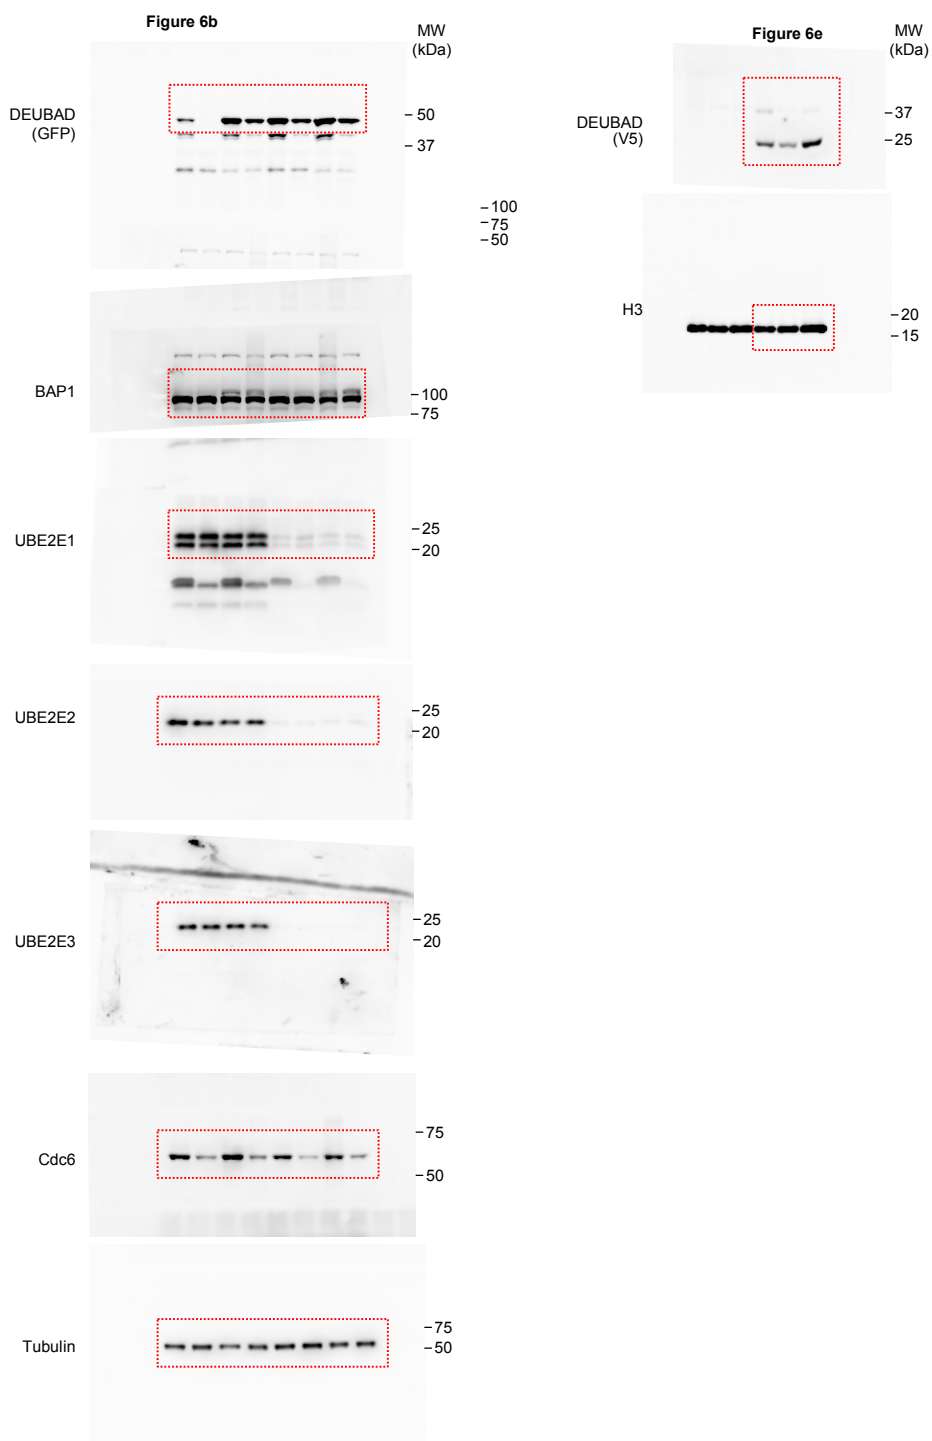

**Supplementary Figure 21.** Uncropped immunoblots used for the indicated proteins in the **Figure 6**

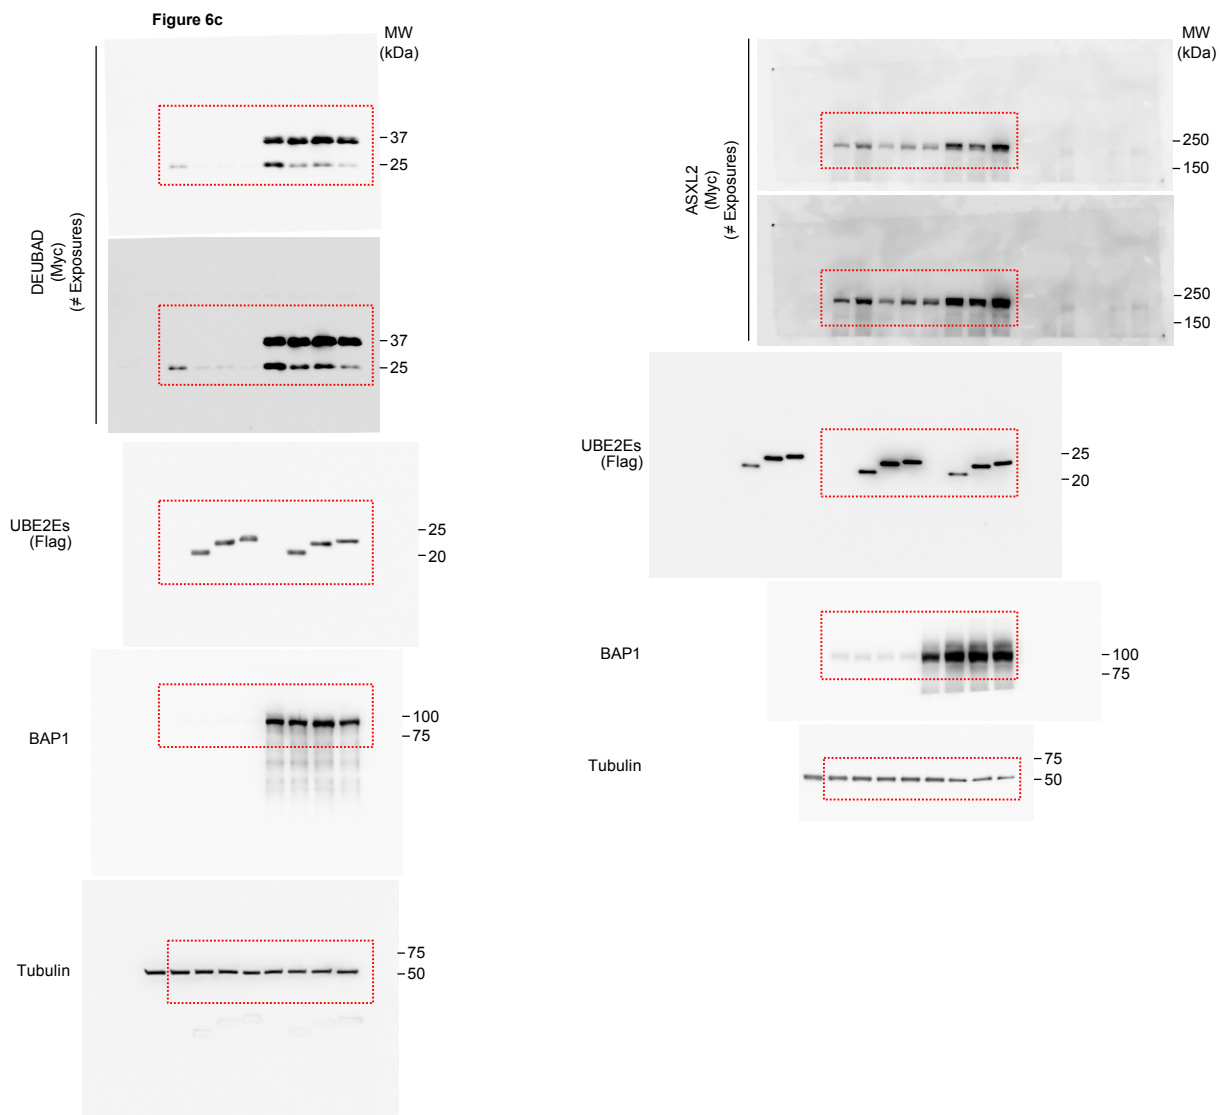

**Supplementary Figure 22.** Uncropped immunoblots used for the indicated proteins in the **Figure 7**

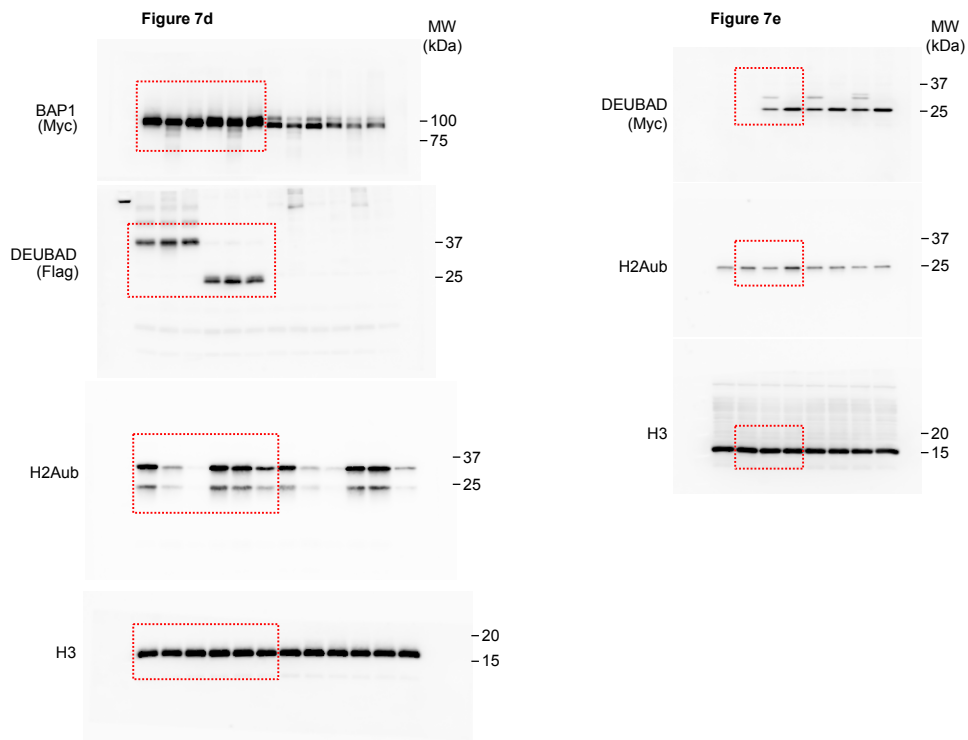

**Supplementary Figure 23.** Uncropped immunoblots used for the indicated proteins in the **Figure 9**

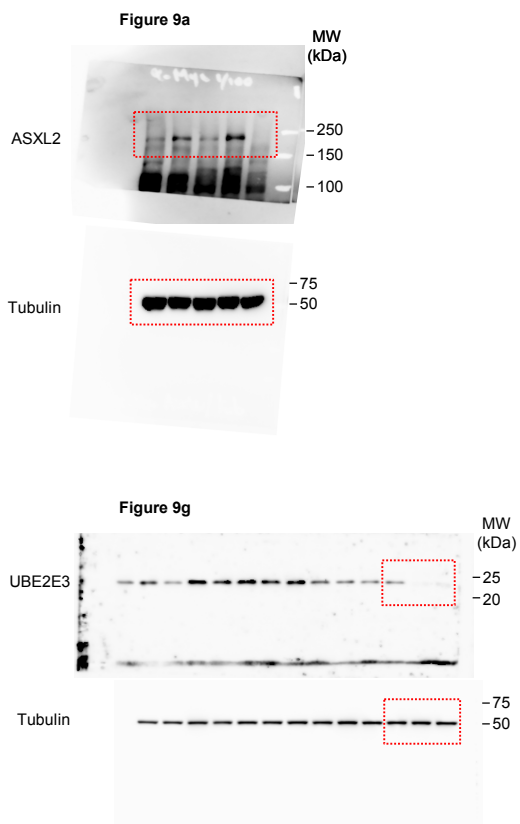

**Supplementary Figure 24.** Uncropped immunoblots used for the indicated proteins in the **Supplementary Figure 1**

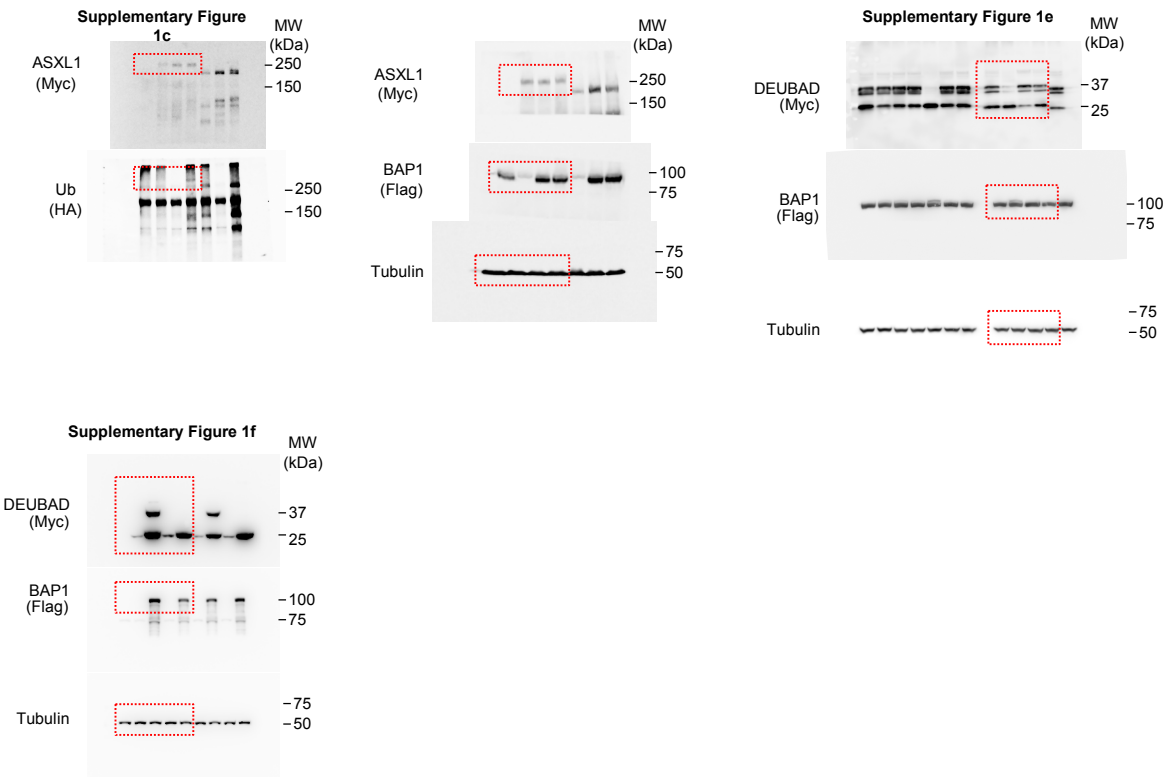

**Supplementary Figure 25.** Uncropped immunoblots used for the indicated proteins in the Supplementary Figure 2

**Supplementary Figure 2a**

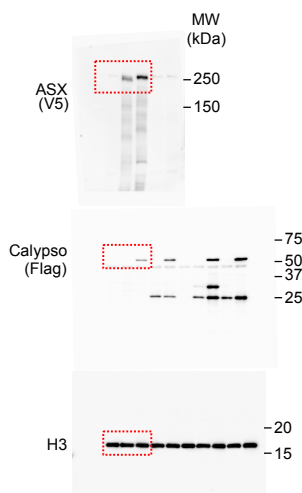

**Supplementary Figure 2b**

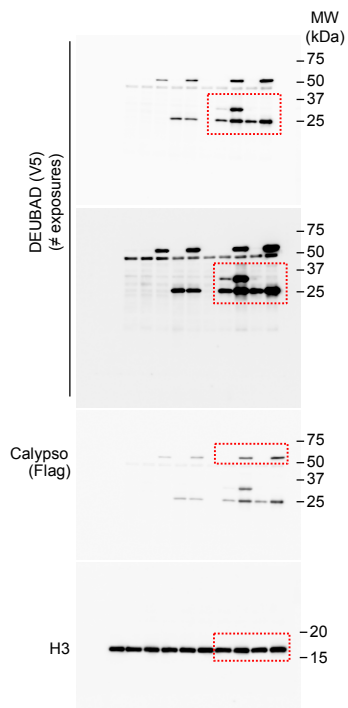

**Supplementary Figure 2c**

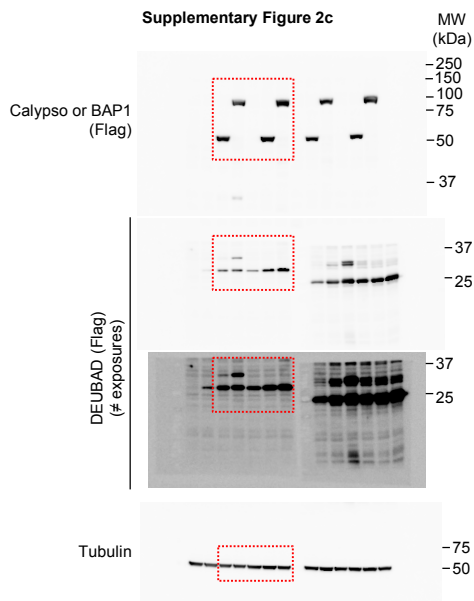

**Supplementary Figure 2d**

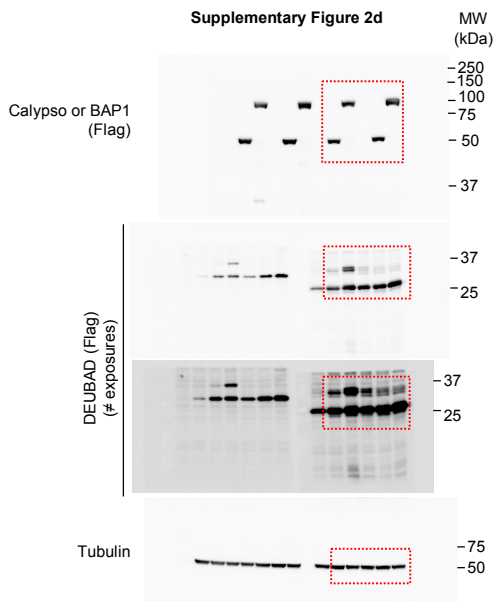



**Supplementary Figure 26.** Uncropped immunoblots used for the indicated proteins in the **Supplementary Figure 2**

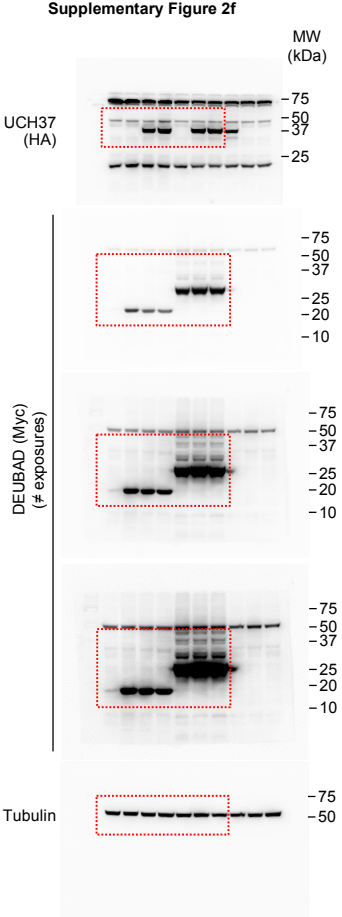

**Supplementary Figure 27.** Uncropped immunoblots used for the indicated proteins in the **Supplementary Figure 3**

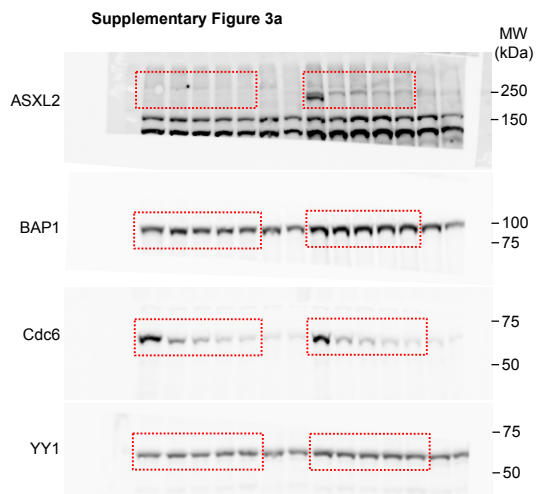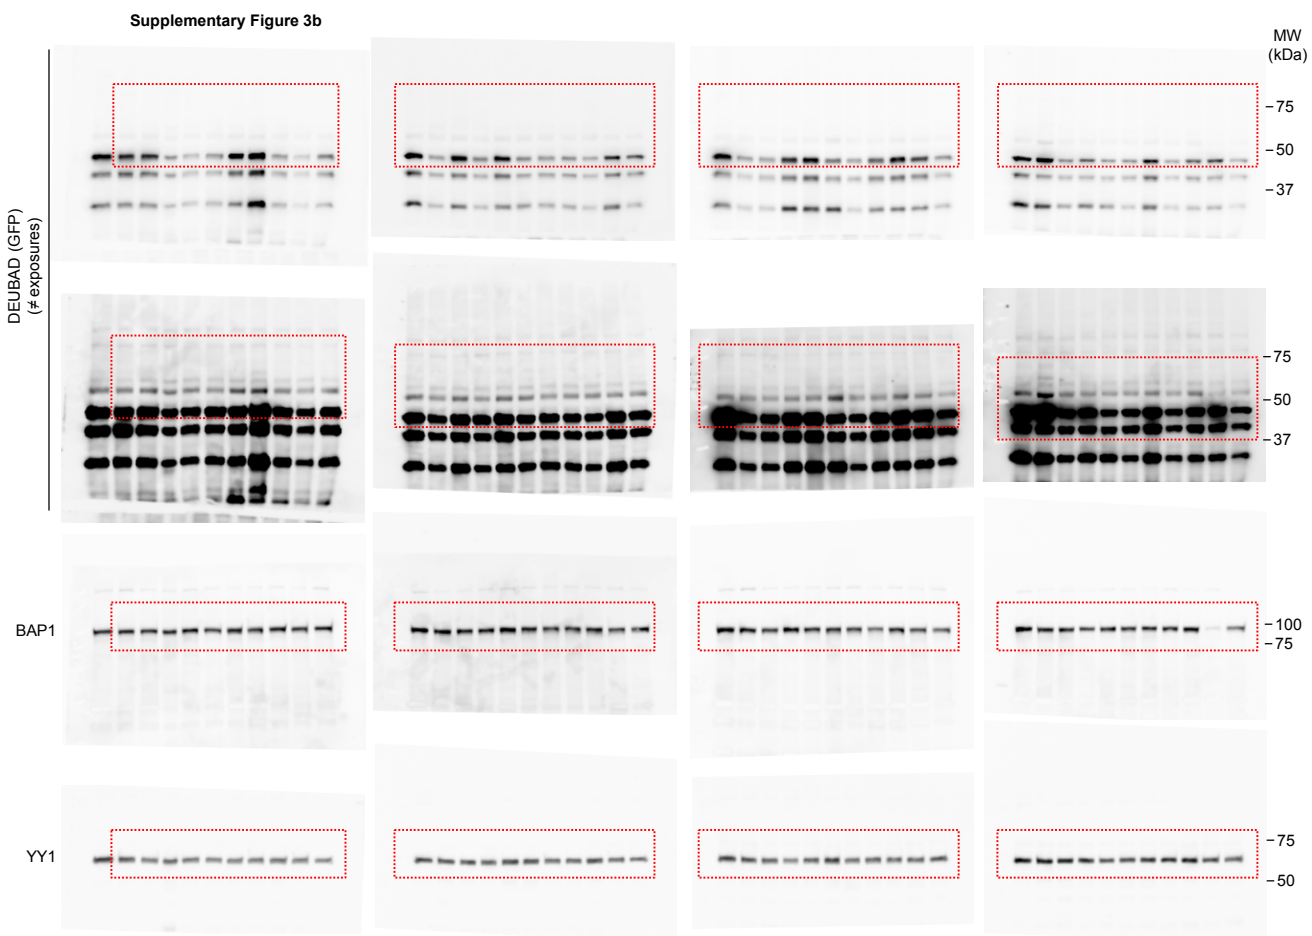

**Supplementary Figure 28.** Uncropped immunoblots used for the indicated proteins in the  
**Supplementary Figure 3b**

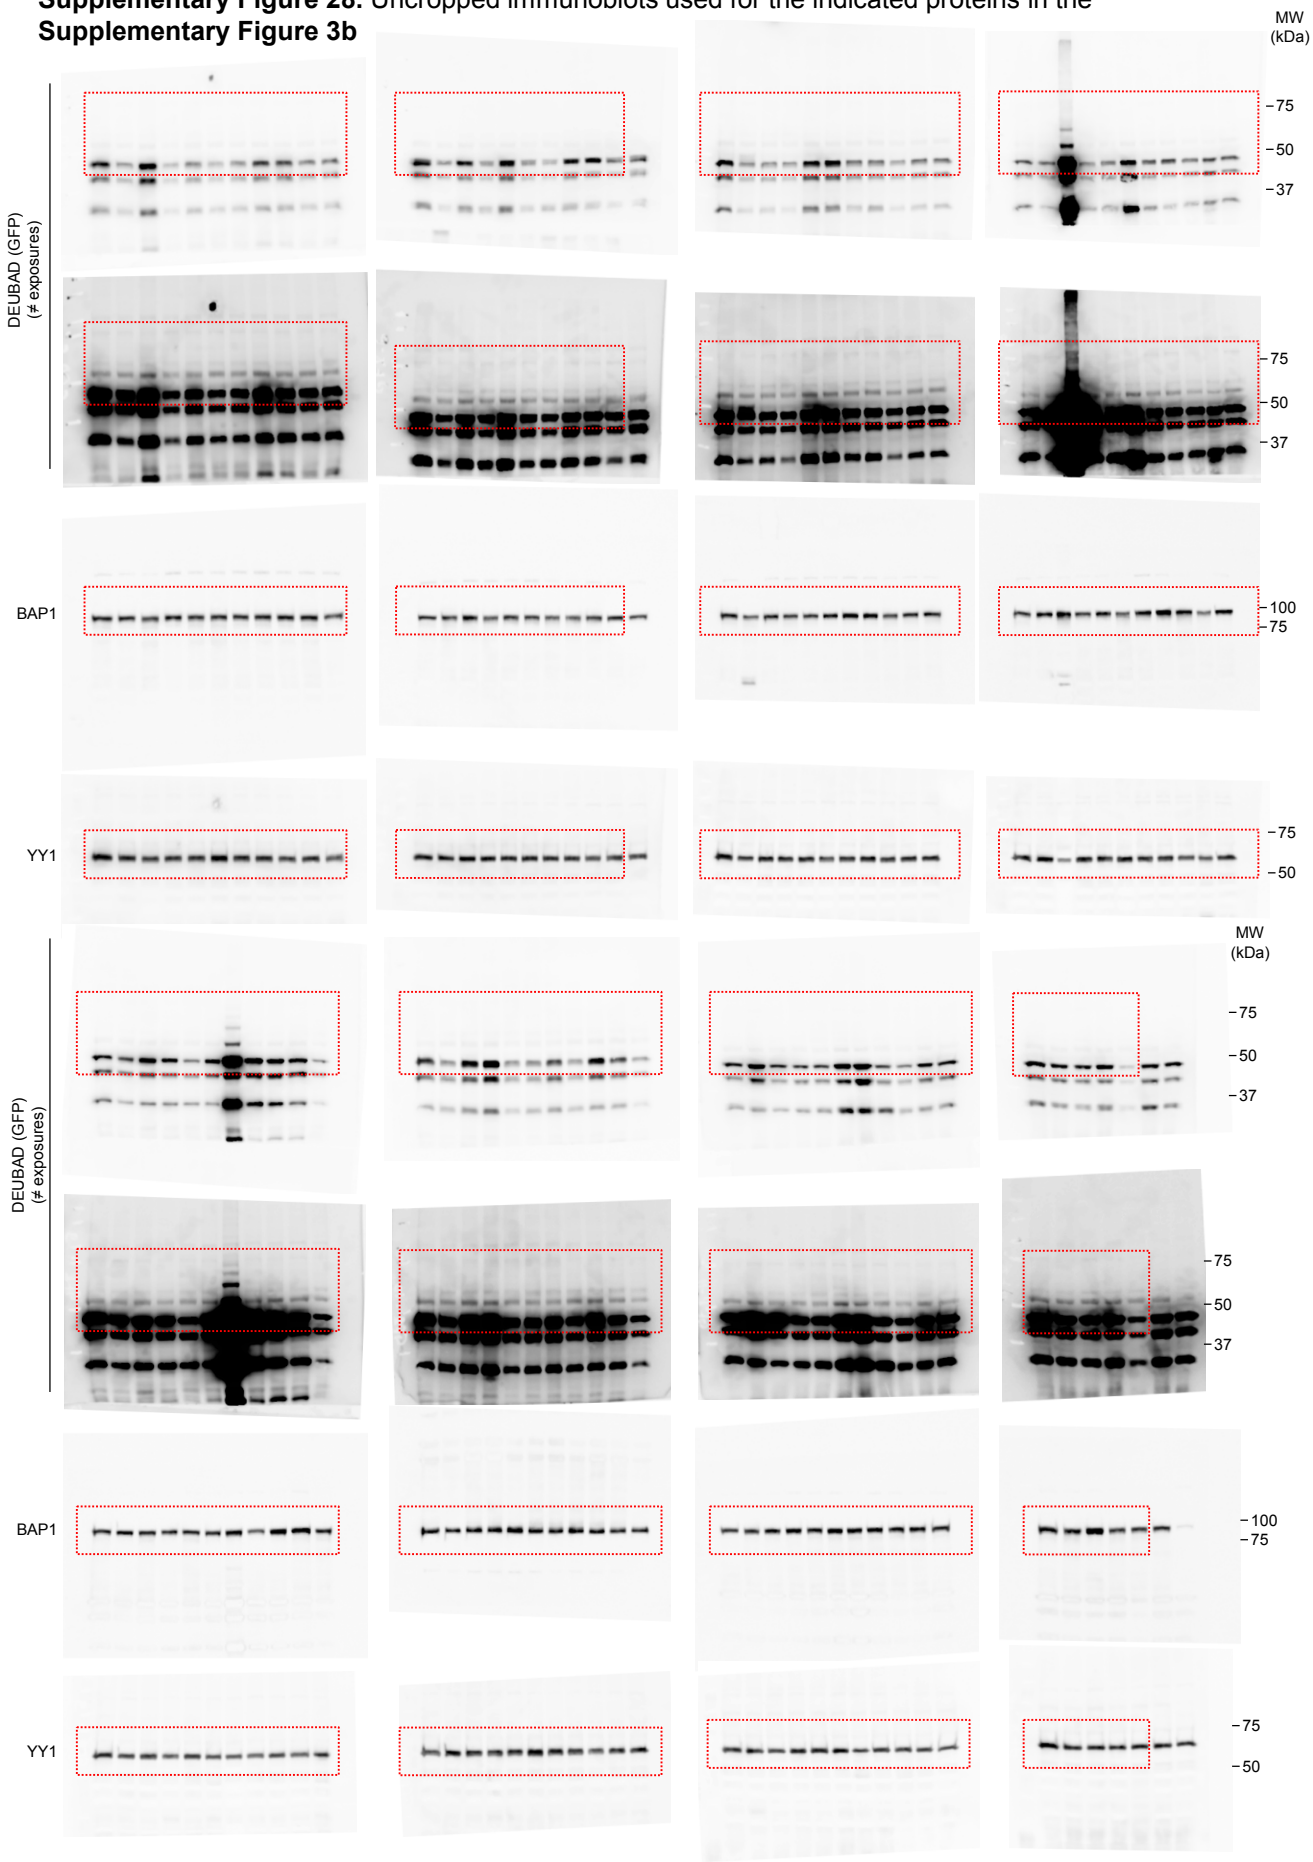

**Supplementary Figure 29.** Uncropped immunoblots used for the indicated proteins in the **Supplementary Figure 4**

**Supplementary Figure 4b**

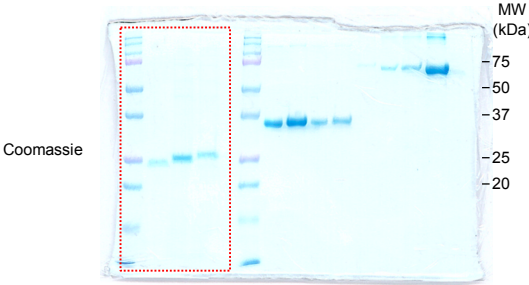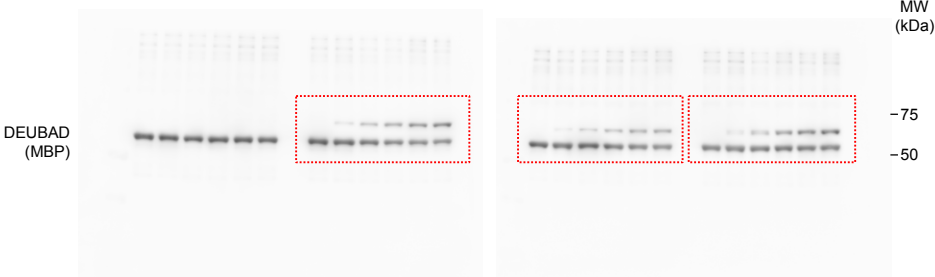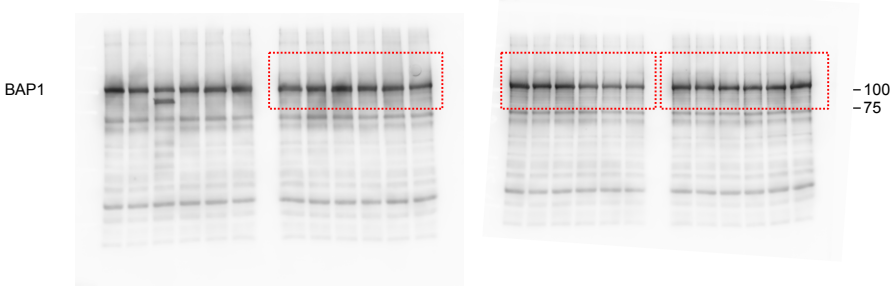

**Supplementary Figure 30.** Uncropped immunoblots used for the indicated proteins in the **Supplementary Figure 5**

**Supplementary Figure 5a**

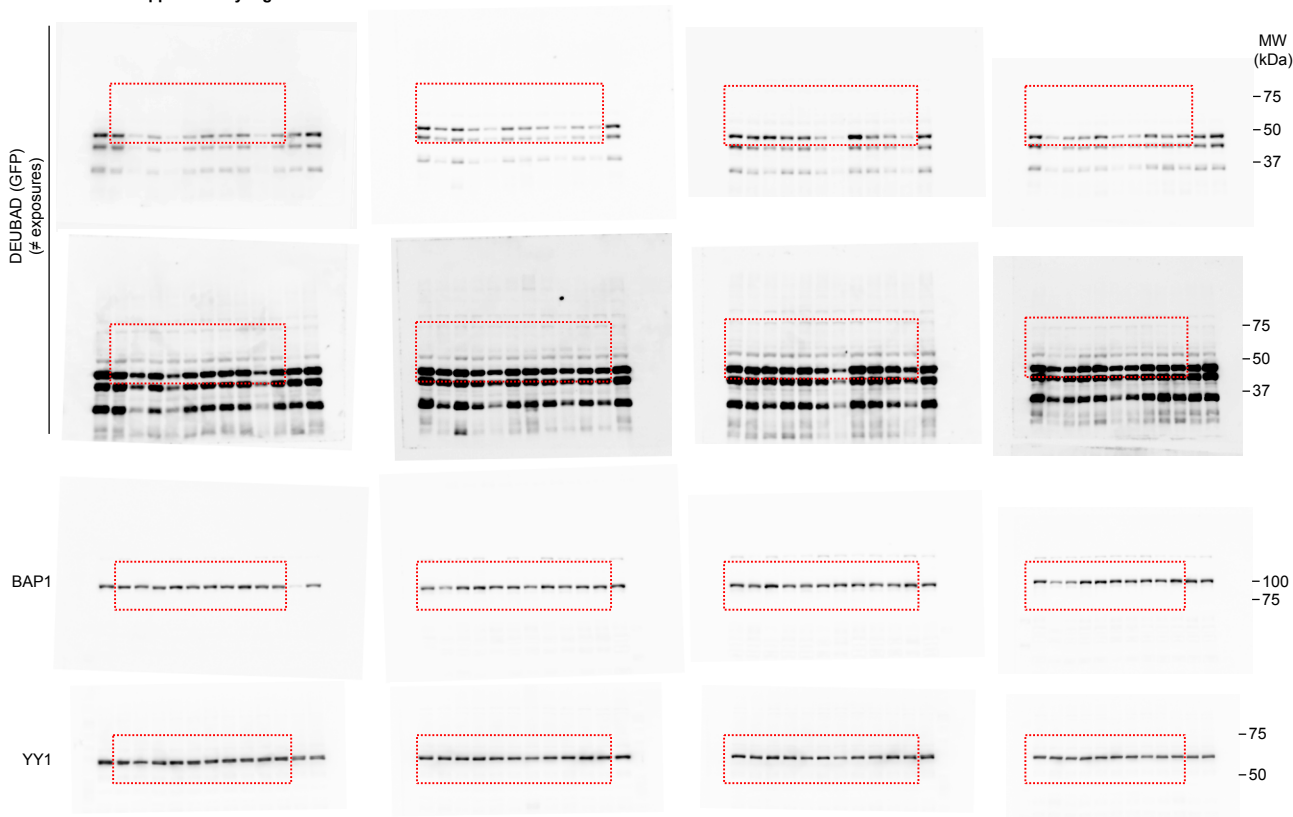

**Supplementary Figure 5c**

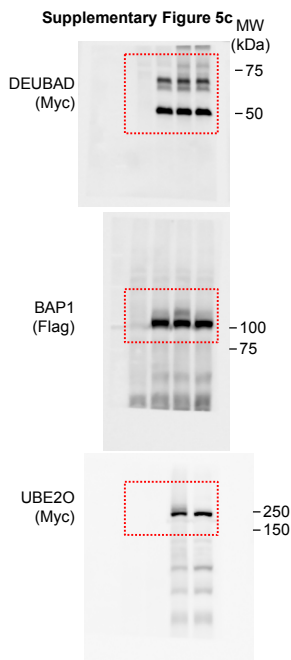

**Supplementary Figure 5d**

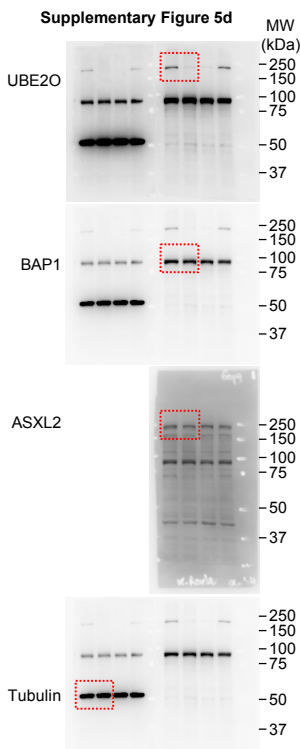

**Supplementary Figure 5e**

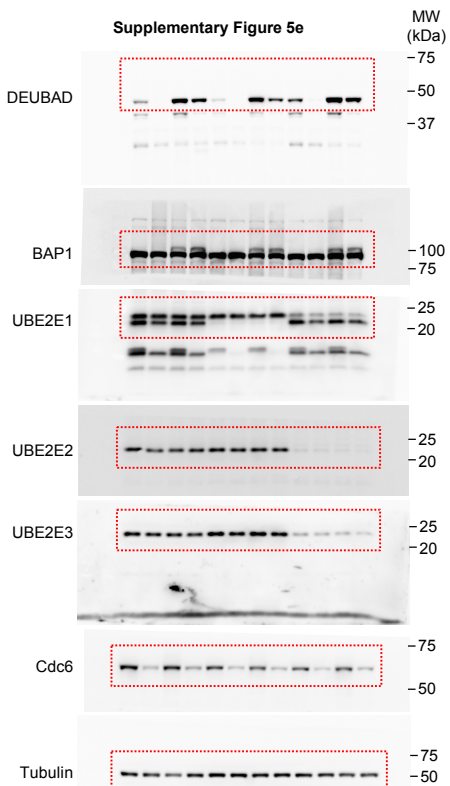



**Supplementary Figure 32.** Uncropped immunoblots used for the indicated proteins in the **Supplementary Figure 9**

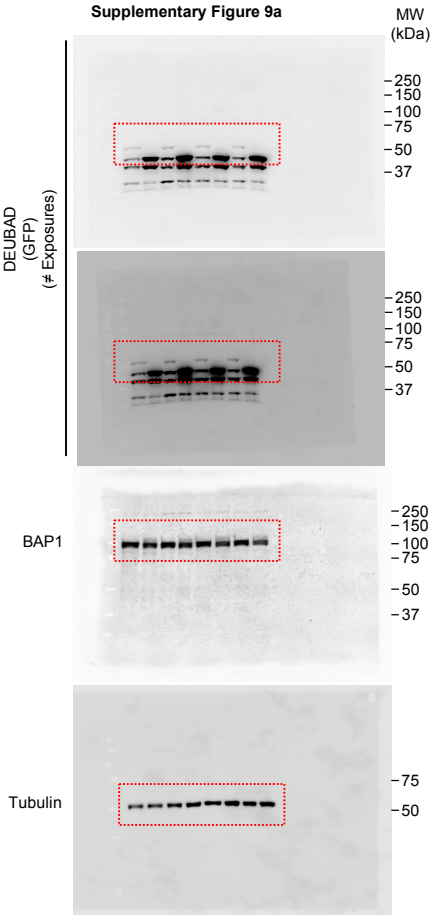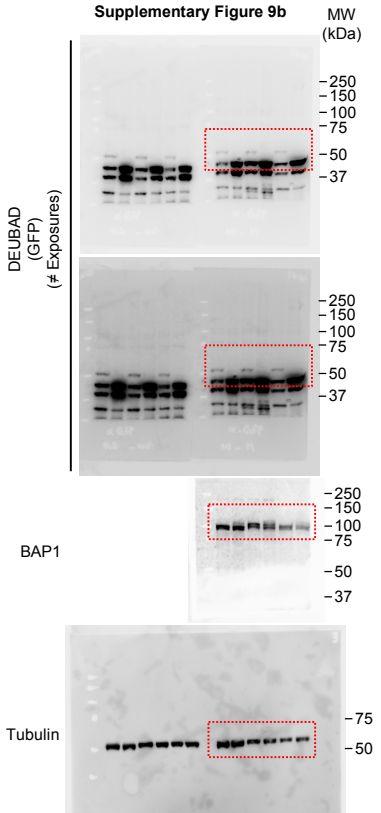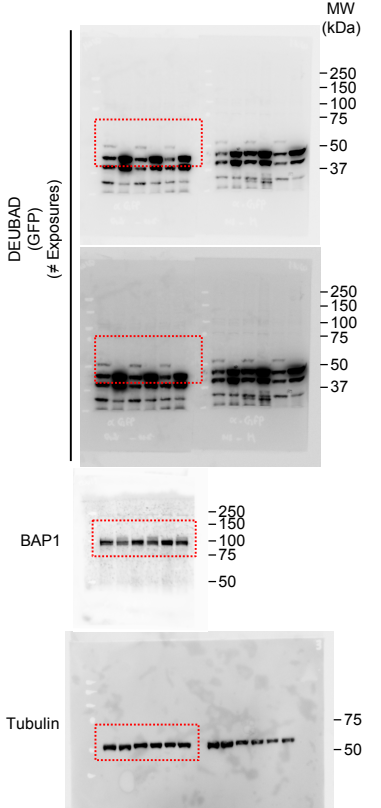

**Supplementary Figure 33.** Uncropped immunoblots used for the indicated proteins in the **Supplementary Figure 9**

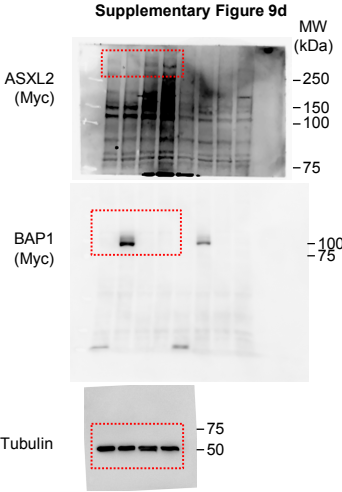



Supplementary Figure 34. Uncropped FACS plots used in the Figure 9

Figure 9b

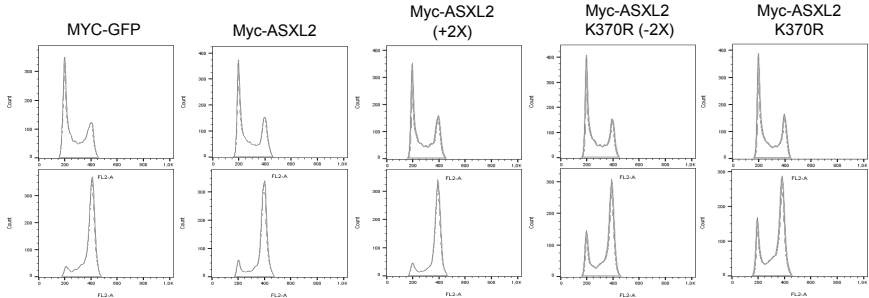

Figure 9e

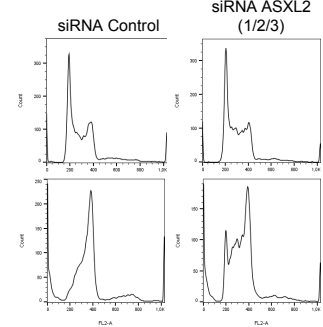

Figure 9i

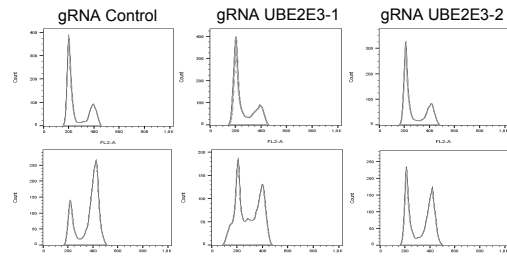

# Supplementary Figure 35. Uncropped FACS plots used in the Supplementary Figure 9

Supplementary Figure 9a

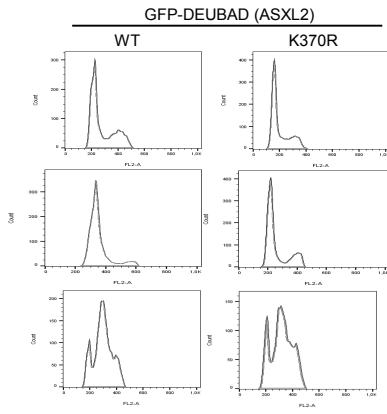

Supplementary Figure 9b

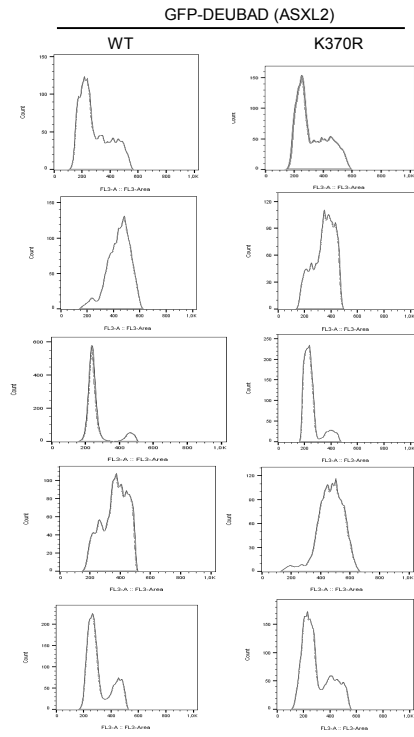

Supplementary Figure 36. Uncropped FACS plots used in the Supplementary Figure 9

Supplementary Figure 9f

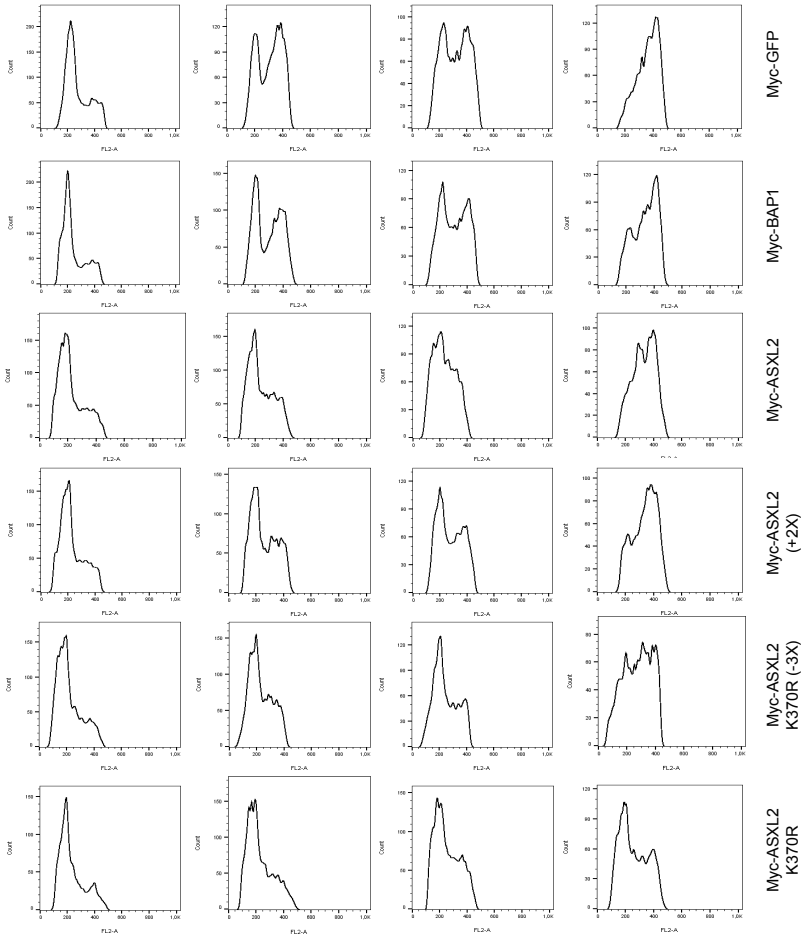

Supplementary Figure 37. Uncropped FACS plots used in the Supplementary Figure 10

Supplementary Figure 10b

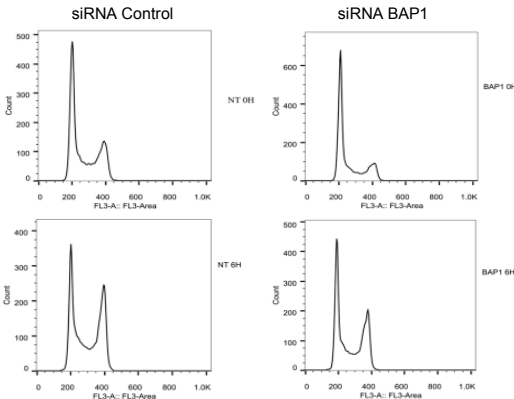

Supplementary Figure 10c

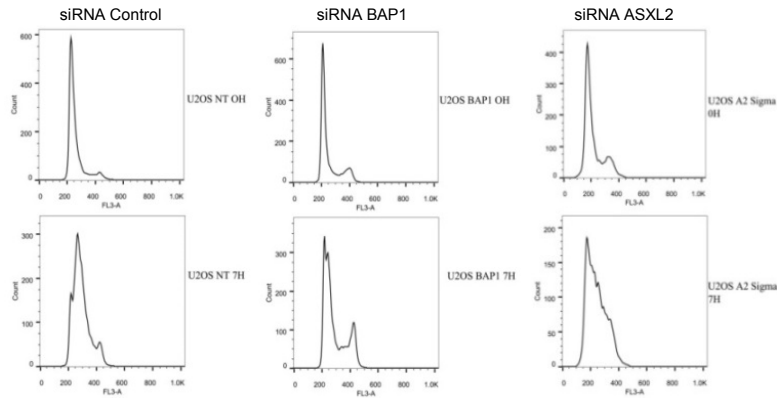

**Supplementary Figure 38.** Example of gating procedure related to **Figures 9b, 9e, 9i,** and **Supplementary Figures 9a, 9b, 9f, 10b, 10c**

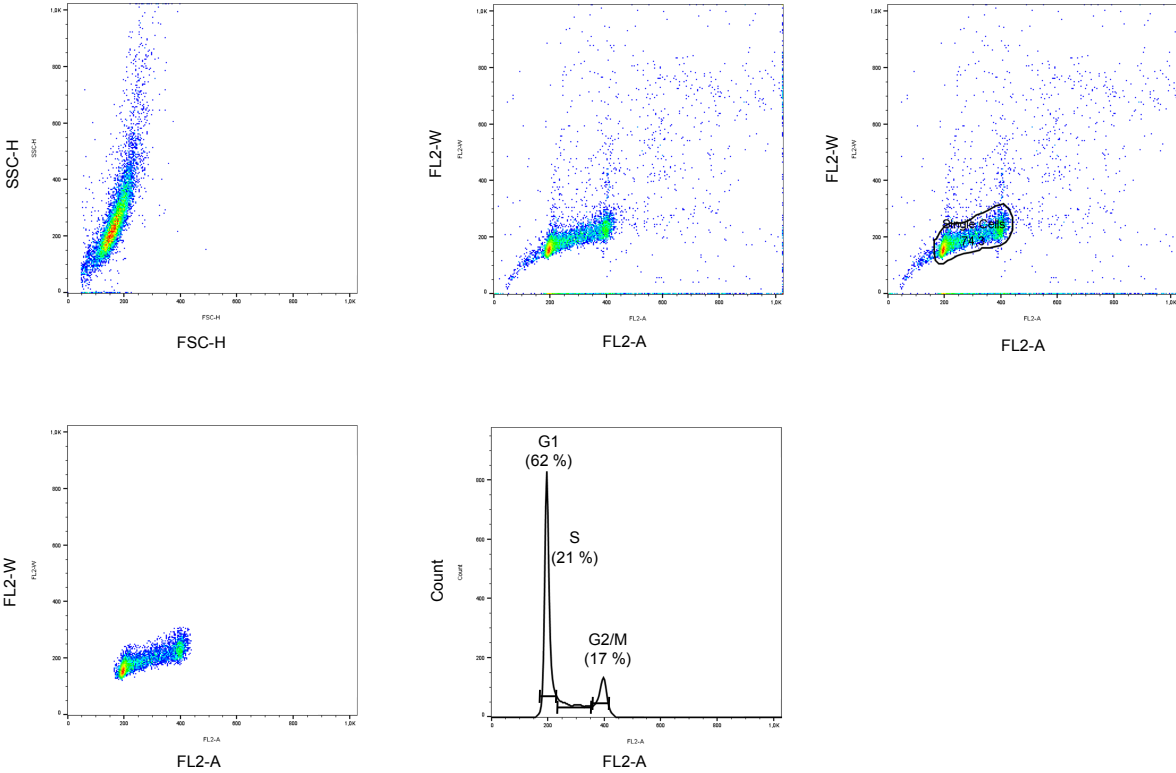

Supplementary Table 1 : DUB siRNA library

| Target      | siRNA_1             | Name               | siRNA_2              | Name               |
|-------------|---------------------|--------------------|----------------------|--------------------|
| FAM63A      | CAGACUUGGUAUUGUCCUU | SASI_Hs01_00094199 | GGGUGAACUUAGCGUCUUU  | SASI_Hs01_00094200 |
| FAM63B      | CCAUCAUCACCCAGAAUGA | SASI_Hs02_00308987 | CUCAGAAUUUCAUCUUCGA  | SASI_Hs01_00060574 |
| FAM188A     | CACAGAUCGCUCUCCUUA  | SASI_Hs01_00110290 | CCUUGAUAGAUCUGUAUA   | SASI_Hs01_00110291 |
| FAM188B     | CUCAUCACCUCAUCACCGA | SASI_Hs01_00139144 | CUCUACUUGCCUGGUGGUA  | SASI_Hs01_00139145 |
| BAP1        | CGUGAUUGAUGAUGAUUU  | SASI_Hs01_00105395 | CCAUCAACGUCUUGGCUGA  | SASI_Hs01_00105396 |
| UCHL1       | GGACAAGAAGUUAGUCCUA | SASI_Hs01_00178415 | GGCCAUAUAUCAAGACAAA  | SASI_Hs01_00178416 |
| UCHL3       | CUGAUUCAUGCUAUUGCAA | SASI_Hs01_00200423 | GCAUCUCUAUGAAUUAGAU  | SASI_Hs01_00200424 |
| UCHL5       | CAGUUAUGUUCUGUUAU   | SASI_Hs01_00142742 | GAAGCAUAAUUAUCUGCCU  | SASI_Hs01_00142743 |
| USP1        | GUUAUCUUCAGGUUUUAUA | SASI_Hs01_00204271 | CCAUAACAAACAUUGGUAAA | SASI_Hs01_00204272 |
| USP2        | GACCUAAGUCCAACCCUGA | SASI_Hs01_00149958 | CUAAGAGACCUGGACUUA   | SASI_Hs02_00337104 |
| USP3        | CGGAUAAACUUUAAUACCU | SASI_Hs01_00023593 | CAUUACACAGCAUACGCAA  | SASI_Hs01_00023595 |
| USP4        | CACUACACUGCAUUGCGA  | SASI_Hs01_00113975 | GAGAAUCACAGGUUGAGGA  | SASI_Hs01_00113976 |
| USP5        | CUGUCAAGCUGGGCACCAU | SASI_Hs02_00319396 | CUAUUGAAGUGUCCGCUU   | SASI_Hs02_00319397 |
| USP6        | GUGUUGAUGCCAAUAACCA | SASI_Hs01_00167628 | GAGAAUGGGAGACAUUAA   | SASI_Hs01_00167629 |
| USP7        | GACGUUUCGAAUAGAGGAA | SASI_Hs01_00079539 | GACUUUGAGAACAGGCGAA  | SASI_Hs01_00079540 |
| USP8        | CCUUUGACAAGAGCAGCAA | SASI_Hs02_00339089 | GAGAAUGGGACCACUGAAU  | SASI_Hs01_00136039 |
| USP9X       | GUCGUUACAGCUAGUAUUU | SASI_Hs01_00026227 | CUGUGAUUCAGCAACUCUA  | SASI_Hs02_00308595 |
| USP9Y       | GUAGUGAUUUACACGAUGA | SASI_Hs01_00081909 | CUUACUAAGAGCCACACUA  | SASI_Hs02_00338066 |
| USP10       | GUCAUUGAACCCAGUGACA | SASI_Hs01_00213007 | GUUCUAAUGUGGAGGCGGA  | SASI_Hs01_00213008 |
| USP11       | CAGAGAUGAAGAAGCGUUA | SASI_Hs01_00148685 | GAUUCUAAUUGCCUAGUAU  | SASI_Hs01_00148686 |
| USP12       | GAAACUCUGUGCAGUGAAU | SASI_Hs01_00167303 | CAUCAGAUUUCUCAAAGAA  | SASI_Hs01_00167305 |
| USP13       | CUGAAUACUUGGUAGUGCA | SASI_Hs01_00108438 | GAGCUAAUUGCAUUCAUCA  | SASI_Hs01_00108439 |
| USP14       | CAUAAUUGUGGAUACUAU  | SASI_Hs01_00089059 | GAUAAUUGGCUCCAUAUUU  | SASI_Hs01_00089060 |
| USP15       | CUCUUGAGAAUGUGCCGAU | SASI_Hs01_00059894 | CACAAUAGAUACAAUUGAA  | SASI_Hs01_00059895 |
| USP16       | CAUCUUUGGUGGUGAACUA | SASI_Hs01_00210886 | GAGAAACUUCGAGAUGCGA  | SASI_Hs02_00304059 |
| USP17L9P    | GAAAUUCCUUAAGAGCAA  | SASI_Hs02_00324631 | GGAAAUUCCUUAAGAGCA   | SASI_Hs02_00324632 |
| USP17L2     | CUAUCAUUGCGGUCUUUGU | SASI_Hs02_00372940 | CAACAAACUUGCCAAGAAU  | SASI_Hs02_00372941 |
| USP17L6P    | GCCUAUCAUUGUGGUGUUU | SASI_Hs02_00494866 | CAGGCAACAAGAUUGCCAA  | SASI_Hs02_00494867 |
| USP17L1P    | CUAUCAUUGCGGUCUUUGU | SASI_Hs02_00517496 | GCAACAAACUUGCCAAGAA  | SASI_Hs02_00517497 |
| USP18       | GCUUCAUUGACUCCAUAU  | SASI_Hs01_00221412 | GUCAUUACUGUGUCUACAU  | SASI_Hs01_00221413 |
| USP19       | CACAAGAUGAGGAAUGACU | SASI_Hs01_00130241 | GCAAGUUCUGCAUUGGUCA  | SASI_Hs01_00130242 |
| USP20       | GGACUUAUCACUGCCCAU  | SASI_Hs01_00033438 | GGUUCUACGUGUCCCGCGA  | SASI_Hs01_00033439 |
| USP21-Iso-1 | CCAACUUAGCCCGUCCAA  | SASI_Hs01_00193567 | GACAAGAUGGCUCAUCACA  | SASI_Hs01_00193568 |
| USP21-Iso-2 | CCAACUUAGCCCGUCCAA  | SASI_Hs01_00177787 | GACAAGAUGGCUCAUCACA  | SASI_Hs01_00177788 |
| USP22       | CAAAGCAGCUCACUAUGAA | SASI_Hs02_00347438 | CUGAUCAACCUUGGGAACA  | SASI_Hs02_00347439 |
| USP24       | GCACAAUACUGUGACCGUA | SASI_Hs02_00347524 | GAAACUCAGGGUUGAUACU  | SASI_Hs02_00347525 |
| USP25       | CUAUGGUUCCGGUCCAAA  | SASI_Hs02_00344762 | GAAAGAUUACCUCACGGUA  | SASI_Hs01_00191397 |
| USP26       | CUACAGAAGUCUACAGGA  | SASI_Hs01_00043149 | CCAUCUUGGGAAGACUCUA  | SASI_Hs01_00043150 |
| USP27X      | GAUACUGAGAGAUUUCUUU | SASI_Hs02_00394607 | CCUGUAUUACGGAGGUUAU  | SASI_Hs02_00394608 |

|                |                      |                      |                      |                      |
|----------------|----------------------|----------------------|----------------------|----------------------|
| <b>USP28</b>   | GACCUUACUCAUGAUAAACA | SASI_Hs01_00077918   | GACACUAUUGGGCCUAUUAU | SASI_Hs01_00077919   |
| <b>USP29</b>   | GAAAGAAGCUCUCAUUGAA  | SASI_Hs01_00032719   | GAAUAACGAGCAAGUUUUAU | SASI_Hs01_00032720   |
| <b>USP30</b>   | CACGAAUUUAUCCAUGUCA  | SASI_Hs01_00155679   | CUAGUCAACACAACCCUAA  | SASI_Hs01_00155680   |
| <b>USP31</b>   | GCAUUCAGGUGUGUCCAUIU | SASI_Hs01_00020641   | GAGUCAUCCUUUUAAGUA   | SASI_Hs01_00020642   |
| <b>USP32</b>   | GAUAAUCAGCCAUUAGUAA  | SASI_Hs01_00086230   | GGAACUAUGUUUAUACGGGA | SASI_Hs01_00086231   |
| <b>USP33</b>   | CACAGAUCCUCCAUCAAA   | SASI_Hs01_00180288   | GAAGUGUUUAUUCAGACAU  | SASI_Hs01_00180289   |
| <b>USP34</b>   | GGAUCUAGCAAUGAGGUUA  | SASI_Hs01_00089169   | GAUCUUAGGGCUGAAGUAA  | SASI_Hs02_00346129   |
| <b>USP35</b>   | GCAAGAUUGGUCUCAUCA   | SASI_Hs02_00353962   | CUGUUAAGAAGUUCAGCAU  | SASI_Hs02_00353963   |
| <b>USP36</b>   | CUAAGACGGUGAAGCUGAA  | SASI_Hs02_00357787   | CGUAUAUGUCCCAGAAUAA  | SASI_Hs01_00194136   |
| <b>USP37</b>   | CAGCUAAGUCAUAACAUUA  | SASI_Hs01_00018875   | CUUGUCUAUUGACAAAGUA  | SASI_Hs02_00354323   |
| <b>USP38</b>   | GAGAGAUAGUCCCAGUGCA  | SASI_Hs01_00189218   | GUGAAACUUCUUUACAGGA  | SASI_Hs02_00360065   |
| <b>USP39</b>   | CAUAUGAUGGUACCACUUA  | SASI_Hs01_00034674   | CAAUGAUUAUGCCAACGCU  | SASI_Hs01_00034675   |
| <b>USP40</b>   | CACUGAAAAGAACUUCUGAU | SASI_Hs01_00145783   | CACAUGUCUUUCCAGCUAA  | SASI_Hs02_00351527   |
| <b>USP41</b>   | GUACGUGCAUCCUUGUGUA  | custom made by Sigma | UUGUUCAGGGCUCUUCAGU  | custom made by Sigma |
| <b>USP42</b>   | CAGUCUACCUCGAACGCAU  | SASI_Hs01_00078970   | GUUAAUAGGUCCUCAGUGA  | SASI_Hs01_00078971   |
| <b>USP43</b>   | GUGAUCUUGGUUGAACUGU  | SASI_Hs02_00367061   | GUGAAAGGCAGAAGCAUUA  | SASI_Hs02_00367062   |
| <b>USP44</b>   | GAAGGAUACUAAUGGGUAA  | SASI_Hs02_00309548   | CAACAAAUCAAUACCAUA   | SASI_Hs02_00309549   |
| <b>USP45</b>   | CCAGUUUACAUCUAUGGAA  | SASI_Hs02_00315256   | CACUACACUGCUUAUGUGA  | SASI_Hs02_00315257   |
| <b>USP46</b>   | GUCUCAUUGGUCUGGCUGU  | SASI_Hs01_00080807   | GGUAUCACUCCGAGUCUCA  | SASI_Hs01_00080808   |
| <b>USP47</b>   | GCAUAUAUGCUGAUCUAUA  | SASI_Hs01_00112225   | CAUGCAAGUUUCUGCUAGA  | SASI_Hs01_00112227   |
| <b>USP48</b>   | CUUUUAUGUCUCUAUUGGAA | SASI_Hs01_00185218   | CUACUUUAUGUCCAAGCACU | SASI_Hs01_00185219   |
| <b>USP49</b>   | CUGAAACACUUGAGGAGA   | SASI_Hs01_00055585   | CUCAGAAGUGGUGCUGCUU  | SASI_Hs02_00352112   |
| <b>USP50</b>   | CACUACACUGCUUUCUGCA  | SASI_Hs02_00373416   | GGAAAUAUCCUAAAUAACA  | SASI_Hs02_00373417   |
| <b>USP51</b>   | CAUAGUGUUUCUACCACCA  | SASI_Hs02_00372924   | CAAAGCUACCAGGAGUCUA  | SASI_Hs02_00372925   |
| <b>USP52</b>   | CUGUCUACCUGUCCAUAU   | SASI_Hs02_00329594   | CAGUUUGACAUGAAUUGGA  | SASI_Hs02_00329595   |
| <b>USP53</b>   | GAACCAAGUUUAGAAGUGA  | SASI_Hs01_00234222   | CAGCUAAGUUUAGUCACAU  | SASI_Hs01_00234224   |
| <b>USP54</b>   | GACUUAGCAGAAGAUGUUA  | SASI_Hs02_00366408   | CCAAGUAUUGUUUAGCCAA  | SASI_Hs02_00366409   |
| <b>USP55</b>   | CCAUAUUCAGUUGCACUU   | SASI_Hs02_00340306   | GUAUCGAGCAAUAAUCAU   | SASI_Hs01_00128479   |
| <b>CYLD</b>    | GAACGAUGUAGAAUAUUAU  | SASI_Hs02_00309208   | GAACAGAUUCCACUCUUUA  | SASI_Hs02_00309209   |
| <b>DUB3</b>    | CUAUCAUUGCGUCUUUGU   | SASI_Hs02_00372940   | CAACAAACUUGCCAAGAAU  | SASI_Hs02_00372941   |
| <b>ATXN3</b>   | GAAGAAUUAGCACAACUAA  | SASI_Hs01_00043300   | CAAUGAUGGCUCAGGAAU   | SASI_Hs01_00043301   |
| <b>ATXN3L</b>  | CAUUAUCAUCUAGGGUAU   | SASI_Hs02_00379672   | CAUUUACAUGGAUUUCAU   | SASI_Hs02_00379673   |
| <b>JOSD1</b>   | CGGGAUACGCUGCAAGAGA  | SASI_Hs02_00346483   | CACUUCAGACCAAAGGCUA  | SASI_Hs01_00072064   |
| <b>JOSD2</b>   | GGUGGACGGUGUCUACUAC  | SASI_Hs01_00128488   | GCAACUAUGAUGUCAUUGU  | SASI_Hs01_00128489   |
| <b>JOSD3</b>   | GACAUCUGAUGCUGUGGAA  | SASI_Hs01_00119698   | GAUAAAUCAGGAAUAGAUU  | SASI_Hs01_00119700   |
| <b>TNFAIP2</b> | GGAAGAAAUACACAUUUUU  | SASI_Hs01_00033556   | GGAUGUUACCAGGACAUUU  | SASI_Hs01_00033557   |
| <b>OTUD7B</b>  | CAACUAAUUGGCUCAUCA   | SASI_Hs01_00089029   | CUGAUCAAGCUUGCCUCA   | SASI_Hs01_00089030   |
| <b>OTUD7A</b>  | GUCCUAGCCCAUAUAUJAA  | SASI_Hs01_00055782   | GACUUGAUCGAGCAGGCAA  | SASI_Hs01_00055783   |
| <b>OTUD4</b>   | UAAUUUAUCGGGAACCAAA  | SASI_Hs02_00323440   | GUUUCUCCUUCACAAGUAA  | SASI_Hs02_00323441   |
| <b>PARP11</b>  | CACAAUCAAAACAUGAAU   | SASI_Hs01_00173656   | GUGUUCAGUUAGCAGUGAA  | SASI_Hs02_00353319   |
| <b>OTUD6A</b>  | CACAAUCAAAACAUGAAU   | SASI_Hs01_00173656   | GUGUUCAGUUAGCAGUGAA  | SASI_Hs02_00353319   |

|                 |                      |                         |                     |                         |
|-----------------|----------------------|-------------------------|---------------------|-------------------------|
| <b>YOD1</b>     | GAAAUUUGUGUAGUGGAUA  | SASI_Hs01_00052848      | GUAACUCCCCUGAUCCAGA | SASI_Hs01_00052849      |
| <b>OTUD6B</b>   | GAAGUCAGACCGCUGAGUA  | SASI_Hs01_00222466      | CUACUAAGGAGAAUAAGAU | SASI_Hs02_00348712      |
| <b>OTUD5</b>    | CACUAUAAUUCAGUGGUGA  | SASI_Hs01_00052828      | GGACUUUACCACCUACAUU | SASI_Hs01_00052829      |
| <b>OTUB1</b>    | GCAAGUUCUUCGAGCACUU  | SASI_Hs01_00080525      | CCUGGAAGUUCUJAGGGA  | SASI_Hs02_00350395      |
| <b>OTUB2</b>    | CAGAGUGCCUCGGACCACA  | SASI_Hs01_00010701      | GACAUCAAAGACUUCUGCA | SASI_Hs01_00010702      |
| <b>OTUD1</b>    | CUGAUUUUCACAGUGUAA   | SASI_Hs01_00270248      | GAUGUUUCAUGAUAGCUUU | SASI_Hs01_00270249      |
| <b>OTUD3</b>    | GAAAUUCAGGGCUUAAAUGA | SASI_Hs02_00347304      | GUAGUGAUUCAACUUA    | SASI_Hs02_00347305      |
| <b>ZRANB1</b>   | GAACUUGAAGUAGACUJUA  | SASI_Hs01_00155779      | GAAUCGUCCUUCUGCCUUU | SASI_Hs02_00350242      |
| <b>VCPIP1</b>   | GUAACUGCCUUUCAGGGAA  | SASI_Hs02_00357704      | GAUGUAUGGUCUUAUGCAA | SASI_Hs01_00165636      |
| <b>STAMPB</b>   | CAAAGAAUAUACAGAAUA   | SASI_Hs01_00182263      | CAAAGUGCUGGGUCUGAUU | SASI_Hs01_00182264      |
| <b>STAMBPL1</b> | GAGUUAGCCCGAGGUCAAA  | SASI_Hs01_00241436      | CAAUUCUUCUGGAAUGUA  | SASI_Hs01_00241437      |
| <b>BRCC36</b>   | GUCAGAAUUGUUCACAUUC  | SASI_Hs01_00177040      | CAUCUJACGACGUUCUGAU | SASI_Hs01_00177042      |
| <b>COPS5</b>    | CCAUUUGUAGCAGUGGUGA  | SASI_Hs02_00342404      | GUGAAUCUUGGCGCCUUUA | SASI_Hs01_00209042      |
| <b>COPS6</b>    | GAUCUUCUGUCAGCGUUU   | SASI_Hs02_00342398      | CACACUGGUUGGUCAACUU | SASI_Hs01_00117938      |
| <b>EIF3H</b>    | CAAGGAUCUCUCACUAA    | SASI_Hs01_00072290      | CAAUAUCACCUUUGAGUA  | SASI_Hs01_00072291      |
| <b>EIF3F</b>    | GAGGAUGUACUGUCUGGAA  | SASI_Hs01_00246686      | CCGAUGACUUUGAGACCAU | SASI_Hs02_00336223      |
| <b>IFP38</b>    | CAUAGUGUUGCAAUUGCA   | SASI_Hs01_00017774      | CAUAUGAGCAUCAAAGCCU | SASI_Hs01_00017775      |
| <b>PSMD14</b>   | GGUCUUAGGACAUGAACCA  | SASI_Hs02_00340316      | GUGAUUGAUGUGUUUGCUA | SASI_Hs01_00024446      |
| <b>PRPF8</b>    | CACGUAUCAAGAUUGGACU  | SASI_Hs01_00015918      | GGAUUAUGAUGCGCCGAGA | SASI_Hs01_00015919      |
| <b>PSMD7</b>    | CGUGUUGUUGGUGUGCUUU  | SASI_Hs02_00334491      | CACUUGUUACGAGAUUCA  | SASI_Hs02_00334492      |
| <b>CEZANNE</b>  | CAACUAAUUGGCUCAUCA   | SASI_Hs01_00089029      | CUGAUCAAGCUUGCCUCA  | SASI_Hs01_00089030      |
| <b>CEZANNE2</b> | GUCCUAGCCCAUAUAUJAA  | SASI_Hs01_00055782      | GACUUGAUCGAGCAGGCAA | SASI_Hs01_00055783      |
| <b>MPND</b>     | CCGAGAUGCUGCUGGUGGA  | SASI_Hs01_00162447      | GGAGUGAGGUCGUGGGUUA | SASI_Hs01_00162448      |
| <b>MYSM1</b>    | CUUACGAGAUUUGACACA   | SASI_Hs02_00317976      | GACAAGAUGGAUAAUAGAA | SASI_Hs02_00317977      |
| <b>SEN1</b>     | GAAACAGCCGAAGUCUJUA  | SASI_Hs01_00206194      | GACAUUUGGACCGAUUCUU | SASI_Hs01_00206195      |
| <b>SEN2</b>     | GGAAUAAGUGACUAUCCAA  | SASI_Hs01_00048880      | GCUGUAACAGAGAUGAUUU | SASI_Hs02_00354976      |
| <b>SEN3</b>     | GUGCAUUGGUCCUCAUCU   | SASI_Hs01_00092168      | CUGAUGCCAGCAUCCUCAU | SASI_Hs01_00092171      |
| <b>SEN5</b>     | CUGGUAACCAAAGGAUAUA  | SASI_Hs02_00366591      | GUGCUAAGACCAAGUUCAA | SASI_Hs01_00030279      |
| <b>SEN6</b>     | CAUACAGAUGGCUUAAGCA  | SASI_Hs01_00034500      | CCAUUAUUAAGAACGUCAA | SASI_Hs01_00034502      |
| <b>SEN7</b>     | CAAUAGCAGUGAUUGUGGA  | SASI_Hs02_00312204      | CAGUAUUAUGCCUAGUAAU | SASI_Hs02_00312205      |
| <b>SEN8</b>     | CAGUUCAUCAAGUGCACUA  | SASI_Hs01_00195113      | CCAACUUAUUUGAACAUUU | SASI_Hs01_00195114      |
| <b>Control</b>  | UGGUUUACAUGUCGACUAA  | Human Non-Target<br>1_s | UGGUUUACAUGUUGUGUGA | Human Non-Target<br>2_s |
| <b>Control</b>  | UGGUUUACAUGUUUUCUGA  | Human Non-Target<br>3_s | UGGUUUACAUGUUUUCUA  | Human Non-Target<br>4_s |



Supplementary Table 2: E2 ubiquitin-conjugating siRNA library

| Target | siRNA_1              | Name               | siRNA_2             | Name               | siRNA_3               | Name               |
|--------|----------------------|--------------------|---------------------|--------------------|-----------------------|--------------------|
| AKTIP  | GUUUACAUCCUGUAUACU   | SASI_Hs01_00086240 | GAAUUUACCUUGGUUGUGA | SASI_Hs01_00086241 | GCGUAUUUAAGUUUACAGU   | SASI_Hs01_00086242 |
| BIRC6  | GUUAUGAGCUGCUUGUAGA  | SASI_Hs01_00172666 | GCUACAACAGGACUGACUA | SASI_Hs02_00349133 | GGUACAAUCACAUCUAGCA   | SASI_Hs02_00349134 |
| TSG101 | CUCAUAGCCUUGAAACGAA  | SASI_Hs01_00180607 | CUAUUGAAGACACUAUCUU | SASI_Hs01_00180608 | CUUAUAGAGGUAUACAU     | SASI_Hs02_00341284 |
| UBE2A  | CUUCUACCCUCUCCUAAA   | SASI_Hs01_00056615 | GUCCUUCACUUGUGUUGGA | SASI_Hs02_00335488 | GUACCUGGGUUAUCUUGCAA  | SASI_Hs01_00056617 |
| UBE2B  | CUGGAUGAACCGAAUCCUA  | SASI_Hs01_00017234 | CUCCAUCUAUUGAUAGUUU | SASI_Hs01_00017235 | CUCUCCAUCUAUUGAUAGU   | SASI_Hs01_00017236 |
| UBE2C  | GCUCUCCAUCAGAGCCUU   | SASI_Hs01_00219473 | CCAACAUUGAUAGUCCUU  | SASI_Hs01_00219474 | GGACCAUUCUGCUCUCCAU   | SASI_Hs01_00219475 |
| UBE2D1 | CCUUAAGACUGUGAUGAGA  | SASI_Hs01_00156911 | GAUUAUUGCACAUAUCUA  | SASI_Hs01_00156912 | CAUAUCAAGGUGGAGUCUU   | SASI_Hs01_00156913 |
| UBE2D2 | CUGAGAUUGCUCGGAUCUA  | SASI_Hs01_00228722 | GAAUACUGUACUUCUGUA  | SASI_Hs01_00228723 | CCAUUUGACUGCUUUCUAU   | SASI_Hs01_00228724 |
| UBE2D3 | GAGAAUUGGUUUGAAUUU   | SASI_Hs01_00192688 | GCUUUAUGCUCUAACUGA  | SASI_Hs01_00192689 | GGAGAAUUGGUUUGAAUU    | SASI_Hs01_00192690 |
| UBE2D4 | GCAGCAUGUUGGUGCCAUU  | SASI_Hs01_00206454 | CUCAUCUGCUGCAGAACCA | SASI_Hs01_00206455 | GGCUUUUUGUUGCACCUCAU  | SASI_Hs01_00206457 |
| UBE2E1 | GCUUGUAGUCUGUAAAUUU  | SASI_Hs01_00147122 | GGUAUCUUGCUACAGUAGA | SASI_Hs01_00147123 | CUGAAAUGUAGUACAGAAA   | SASI_Hs01_00147124 |
| UBE2E2 | GAAUGGAGGUACAUCUAU   | SASI_Hs01_00102037 | GGUUAACCUCCGAACAAG  | SASI_Hs01_00102038 | CGGCUUUAACUUAUUCUAA   | SASI_Hs01_00102039 |
| UBE2E3 | GUGUAUUGUUUAUCUGAU   | SASI_Hs01_00107201 | GUAGUUUAGUUUUGUUUA  | SASI_Hs01_00107202 | CAUCUGUCUGGACAUCUU    | SASI_Hs01_00107203 |
| UBE2F  | GAGUUGUCUGCUAACCUUA  | SASI_Hs01_00199216 | GAGAGAACAUCUUAUGAU  | SASI_Hs01_00199220 | CGGAAUAAAGUGGUAUGACU  | SASI_Hs02_00362455 |
| UBE2G1 | CAACUGAUCGCGAAUAAU   | SASI_Hs01_00219877 | GGAAGAAUUGUAAAGACCU | SASI_Hs01_00219879 | CACCUAAUUGCUGGACUUCU  | SASI_Hs02_00335492 |
| UBE2G2 | CACCCUUCUGGGUCCUUC   | SASI_Hs01_00077052 | CCAGAAGCUCUUCUGAA   | SASI_Hs01_00077053 | CCCAGAAGCUCUUCUGA     | SASI_Hs01_00077054 |
| UBE2H  | CAGCUCUUGGAGUUGAAGA  | SASI_Hs02_00335498 | GACUUAUUGAAUUGUAGU  | SASI_Hs01_00024164 | GAGAGUAAACAUGAGGUUA   | SASI_Hs01_00024165 |
| UBE2J1 | GAAGUCAUUAUCUGGAA    | SASI_Hs01_00027696 | CCUUUAGAGGAUACCUUU  | SASI_Hs01_00027697 | CUUAUGAGCUGUGACUCAA   | SASI_Hs01_00027698 |
| UBE2J2 | GGUUUGCAGCCUUUGCUUA  | SASI_Hs01_00095058 | GAGACGUCGGACUUCACGA | SASI_Hs01_00095059 | CUGAAGUCGUGGAGGAGAU   | SASI_Hs01_00095060 |
| UBE2K  | GCAUAGAGAGCUGCUGAUA  | SASI_Hs02_00325256 | GGAAGAAACUAGCUACUUU | SASI_Hs02_00325257 | GUAGAUUUGUAGAUAGAGA   | SASI_Hs02_00325258 |
| UBE2L3 | CUAGUUCUGCUCUUCUUGU  | SASI_Hs01_00049984 | GGCUUUUUGUUCUGACAA  | SASI_Hs01_00049991 | CUGACAACCCUCCAUUAGA   | SASI_Hs01_00049985 |
| UBE2L6 | GAUUUAGGUGCUAAACCGU  | SASI_Hs01_00205565 | CACUGAUGGAAUUAUCAG  | SASI_Hs01_00205566 | CCCAUCAUCAGCAGUGAGA   | SASI_Hs01_00205567 |
| UBE2M  | CCUGCAGUAUCUUCUUG    | SASI_Hs01_00232487 | CUCCAUAUUUUAUGCCUG  | SASI_Hs01_00232488 | GGUGAAGUGUGAGACAAG    | SASI_Hs01_00232489 |
| UBE2N  | CAGACAUUCUUCAGUCCUUU | SASI_Hs01_00012964 | GAAGAAUUGUUUAGAUAU  | SASI_Hs01_00012965 | CCUCUUUGUUUGCAUUUAA   | SASI_Hs01_00012966 |
| UBE2NL | GUUUUUAAAUGAUCCAAU   | SASI_Hs01_00199377 | CCAAUCAUUAAGUGUGCAU | SASI_Hs01_00199378 | CCAGACAUUCUUCAGUUUUAU | SASI_Hs01_00199379 |
| UBE2O  | GAGACUUCGUGGUAAGUAA  | SASI_Hs01_00037229 | CUGACAUUCGUAUCGCAU  | SASI_Hs01_00037230 | CAUGGAUUACCAAGAGUUU   | SASI_Hs01_00037231 |
| UBE2Q1 | CUGUAUGAUUGGAAUGUCA  | SASI_Hs01_00241781 | GUUUAUUGGAAUUGUAAA  | SASI_Hs01_00241782 | CAUGGAACUUCUACACAAA   | SASI_Hs01_00241783 |
| UBE2Q2 | GGCUAAAUAUGUUGACUGU  | SASI_Hs01_00128047 | GGUGUUAACCUUGUCUCUA | SASI_Hs01_00128048 | CUGUUGUAUGUUUGACUA    | SASI_Hs01_00128049 |
| UBE2R1 | CUCCUUAAGACGACAGACUA | SASI_Hs02_00337425 | GGACCAUUCUCCUGAGUGU | SASI_Hs01_00071093 | GAAGGAUCGGAGUACACA    | SASI_Hs01_00071094 |
| UBE2R2 | GAGUAACCCUCCAGAAU    | SASI_Hs01_00058641 | CUUCAGAUUCUUGACAAA  | SASI_Hs01_00058647 | CACAGAAUGUCUGAAUUCU   | SASI_Hs01_00058642 |
| UBE2S  | CCCUGUCUGCUCACAGAGAU | SASI_Hs01_00070712 | GCCUGCUCUUGGAGAACUA | SASI_Hs01_00070713 | CGCCUGCUCUUGGAGAACU   | SASI_Hs01_00070714 |
| UBE2T  | GCCAACACACCUUAUGAGA  | SASI_Hs01_00129086 | CUGCUCAUGUCAGAACCCA | SASI_Hs01_00129087 | CCAACACACCUUAUGAGAA   | SASI_Hs01_00129088 |
| UBE2U  | CUGCUAAGCCUGUAAGUGA  | SASI_Hs01_00182543 | CCAGAAUACUGGUUAAAGA | SASI_Hs01_00182544 | GAAUACUGGUUAAAGAUGA   | SASI_Hs02_00366264 |
| UBE2V1 | GCCUAAUAGAUUCUAAAGA  | SASI_Hs01_00020112 | CUUUUUAAAUGAUUCCCA  | SASI_Hs01_00020119 | CCACUGUCCACGUAGUUGA   | SASI_Hs01_00020121 |
| UBE2V2 | GUUGUACUUAAGAGCUAA   | SASI_Hs01_00031079 | GUCAGUUAGAUUUGUAACA | SASI_Hs01_00031080 | CUGACUACUAGUAGUAUCA   | SASI_Hs01_00031082 |
| UBE2W  | CAUGUAACAAGAAUCCAAA  | SASI_Hs02_00303787 | CAAUCAGUUUGUCUAGCA  | SASI_Hs02_00303788 | CAACUGUUUAUUAUUGGAU   | SASI_Hs01_00231191 |
| UBE2Z  | CUGUUGACAUAGACUAAGAU | SASI_Hs01_00048090 | GAAUGUAUCGGCAGCAGA  | SASI_Hs01_00048091 | GAAAGUCUGCUUGAGUAUU   | SASI_Hs01_00048092 |
| UEV3   | GAUGUAUCAGGGUAAUACA  | SASI_Hs01_00049331 | GUUUAUCAGGGUAAUACA  | SASI_Hs01_00049334 | CCAAUUCGUUUCUGGAUUU   | SASI_Hs01_00049335 |

Supplementary Table 3: Mesothelioma IHC analysis

|             | Specimen ID | Histology                  | UBE2E3                                                                          | UBE2E1                                                                                                                                                                                                                                             | UBE2E2                                                                                                        | ASXL2                                                                                                   |
|-------------|-------------|----------------------------|---------------------------------------------------------------------------------|----------------------------------------------------------------------------------------------------------------------------------------------------------------------------------------------------------------------------------------------------|---------------------------------------------------------------------------------------------------------------|---------------------------------------------------------------------------------------------------------|
| WT BAP1     | MVB0020     | epithelial                 | positive on normal meso cells                                                   | Negative on tumor cells, positive mostly nuclear blood vessels, muscles cells and lymphocytes                                                                                                                                                      | Positive in cytoplasm of tumor cells. Stains cytoplasm of inflammatory cells, muscle cells and blood vessels. | Focally Positive in cytoplasm of tumor cells. Stains cytoplasm of blood vessels and inflammatory cells. |
|             | MVB0061     | sarcomatoid                | mostly positive on nuclear and cytoplasmic, area where tumor cells are negative | n/a damaged sample                                                                                                                                                                                                                                 | Negative in tumor cells                                                                                       | Negative                                                                                                |
|             | MVB0077     | biphasic                   | positive, mostly cytoplasmic                                                    | Negative in tumor cells                                                                                                                                                                                                                            | Strongly positive in cytoplasm of tumor cells                                                                 | Focally positive in cytoplasm of tumor cells.                                                           |
|             | MVB0428     | epithelial                 | focally positive on both nuclear and cytoplasmic                                | Negative in tumor cells                                                                                                                                                                                                                            | Positive cytoplasmic staining in tumor cells *                                                                | Positive in nucleus of tumor cells*                                                                     |
|             | MVB0436     | epithelial                 | positive, mostly nuclear                                                        | Negative in tumor cells                                                                                                                                                                                                                            | Positive cytoplasmic in tumor cells                                                                           | Focally positive in cytoplasm of tumor cells.                                                           |
|             | MVB0453     | high grade epithelial/sarc | positive, mostly nuclear                                                        | Negative in tumor cells                                                                                                                                                                                                                            | Positive cytoplasmic in tumor cells * pic of blood vessels                                                    | Positive in cytoplasm only *                                                                            |
|             | MVB0456     | epithelial/biphasic        | positive, nuclear                                                               | Negative in tumor cells                                                                                                                                                                                                                            | Positive in cytoplasm of tumor cells                                                                          | Focally positive mostly in cytoplasm in tumor cells. In normal mesothelial cells, focally positive 40%  |
|             | MVB0469     | biphasic                   | positive, mostly nuclear                                                        | Focally positive nucleus 30% in tumor cells, Positive in lymphocytes nucleus                                                                                                                                                                       | Positive in cytoplasm of tumor cells 70%                                                                      | Positive nuclear and cytoplasmic staining                                                               |
|             | MVB0479     | biphasic                   | positive, nuclear                                                               | Focally positive in nucleus of tumor cells 30%                                                                                                                                                                                                     | Negative in tumor cells                                                                                       | Negative                                                                                                |
|             | MVB0489     | epithelial                 | positive, nuclear                                                               | Negative in tumor cells                                                                                                                                                                                                                            | Negative in tumor cells                                                                                       | Negative                                                                                                |
| BAP1 mutant | MVB0026     | epithelial                 | positive, mostly nuclear                                                        | Focally positive nuclear 30% of tumor cells, Some tumor cells also have nuclear plus cytoplasmic staining. Nuclear staining is always much stronger than cyto. Negative tumor cells are negative in cyto and nucleus. Stains nuclei of lymphocytes | Positive Largely cytoplasmic staining in tumor cells.                                                         | Focally positive nuclear 30% tumor cells and weak cytoplasmic staining.                                 |
|             | MVB0029     | epithelial                 | focally positive, weak mostly cytoplasmic                                       | Negative in tumor cells. Focally, some tumor cells show cytoplasmic staining. Lymphocytes show nuclear staining                                                                                                                                    | focally, 5%of tumor cells show cytoplasmic staining, tumor cells largely negative                             | Negative                                                                                                |
|             | MVB0389     | epithelial                 | negative, mostly. Few areas of positivity                                       | Negative in tumor cells                                                                                                                                                                                                                            | Focally positive in cytoplasm of tumor cells 20% *                                                            | Negative                                                                                                |
|             | MVB0405     | epithelial                 | negative, largely. Some nuclear, focal positivity                               | Negative in tumor cells with some focal rare cytoplasmic staining. Lymphocytes and blood vessels are positive in nuclei                                                                                                                            | Focally positive in cytoplasm 10% of tumor cells. Normal mesothelial cells positive in cytoplasm              | Negative on tumor cells, shows some nuclear positivity on normal mesothelial                            |
|             | MVB0409     | epithelial                 | negative, mostly. Some weak focal nuclear staining                              | Negative in tumor cells                                                                                                                                                                                                                            | Focally positive in cytoplasm 20% of tumor cells                                                              | Positive in nucleus of tumor cells                                                                      |
|             | MVB0432     | epithelial                 | negative. Some weak focal cytoplasmic staining                                  | Negative in tumor cells                                                                                                                                                                                                                            | Focally Positive in cytoplasm of tumor cells 70%                                                              | Negative                                                                                                |
|             | MVB0447     | epithelial                 | negative                                                                        | Negative in tumor cells                                                                                                                                                                                                                            | Negative in tumor cells                                                                                       | Negative                                                                                                |
|             | MVB0451     | epithelial                 | positive, nuclear                                                               | Focally positive in nucleus of tumor cells 10%                                                                                                                                                                                                     | Focally positive in cytoplasm *                                                                               | Negative                                                                                                |
|             | MVB0471     | epithelial                 | negative. Occasional weak focal cytoplasmic staining                            | Focally positive in nuclei of tumor cells 50%                                                                                                                                                                                                      | Focally positive in cytoplasm of tumor cells 10%. Plasma cells positive in cytoplasm                          | Positive in nucleus of tumor cells 50%                                                                  |
|             | MVB0491     | biphasic                   | focally positive ~50% in nucleus                                                | Positive in nucleus and cytoplasm 50% of tumor cells                                                                                                                                                                                               | Positive in cytoplasm of tumor cells                                                                          | Positive in nucleus and cytoplasm of tumor cells 20%                                                    |

Supplementary Table 4: List of Oligonucleotides used

| Primer name                 | Sequence                                                    |
|-----------------------------|-------------------------------------------------------------|
| ASXL2ΔASXN_Foward           | GGCCGCACATATGGGGAAGAAGTCATTCCAGA                            |
| ASXL2ΔASXN_Reverse          | GATCTCTGGAATGACTTCTCCCATATGTGC                              |
| ASXL2ΔPHD_Foward            | GGCTCCGCGGCCGCCCTTACCATGAGGGAAAAGGGACGTAGGAAG               |
| ASXL2ΔPHD_Reverse           | GCCTTACCTGGCGCGCCTCATACCTG GCTACCTGGTACAGCAGAGTT            |
| DEUBAD(ASXL2) K289R_Foward  | GCACTGATCAACAGGCACACATTTTCAGTCCTT                           |
| DEUBAD(ASXL2) K289R_Reverse | GAAAATGTGTGCCTGTTGATCAGTGCTCGCAGAT                          |
| DEUBAD(ASXL2) K340R_Foward  | CCAAGGCTGGAGGGAAAGACTCTCAGAAGGTGA                           |
| DEUBAD(ASXL2) K340R_Reverse | AGAGTCTTCCCTCCAGCCTTGGGCTGCTGAAG                            |
| DEUBAD(ASXL2) K365R_Foward  | GAAGGAGAAAAGAGTGAGCCATGGAAAGAACA                            |
| DEUBAD(ASXL2) K365R_Reverse | CATGGCTCCACTCTTTTCTCCTTCTCAATCTCTTG                         |
| DEUBAD(ASXL2) K370R_Foward  | GGAGCCATGGAGAGAACAATTCTTTGAAAGCTAC                          |
| DEUBAD(ASXL2) K370R_Reverse | AGAATTGTTCTCTCCATGGCTCCACTTTTTTCTCC                         |
| DEUBAD(ASXL2) K390R_Foward  | TGAAGATTCTAGGAAATTGACAGCTTCTCCAGT                           |
| DEUBAD(ASXL2) K390R_Reverse | AGCTGTCAATTTCTAGAAATCTTCAAGGCTCAGGC                         |
| DEUBAD(ASXL2) K391R_Foward  | GAAGATTCTAAGAGATTGACAGCTTCTCCAGTGA                          |
| DEUBAD(ASXL2) K391R_Reverse | AGAAGCTGTCAATCTCTTAGAATCTTCAAGGCTC                          |
| DEUBAD(ASXL1) K351R_Foward  | GGAACAATGGAGAGAAAAGTTCTTTGAAGACTAC                          |
| DEUBAD(ASXL1) K351R_Reverse | AGAACTTTTCTCTCCATTGTTCCACCTTCTTTTC                          |
| DEUBAD(ASXL1) K353R_Foward  | CAATGGAAAGAAAGTTCTTTGAAGACTACTATGG                          |
| DEUBAD(ASXL1) K353R_Reverse | CTTCAAAGAACCCTTTCTTTCCATTGTTCCACCT                          |
| DEUBAD(ASXL1) K362R_Foward  | CTATGGACAGAGGCTGGGTTTGACCAAAGAAGAG                          |
| DEUBAD(ASXL1) K362R_Reverse | GTCAAACCCAGCCTCTGTCCATAGTAGTCTTCAA                          |
| GFP_gRNA_Foward             | caccgGGGCGAGGAGCTGTTACCCG                                   |
| GFP_gRNA_Reverse            | aaacCGGTGAACAGCTCCTCGCCCc                                   |
| hUBE2E3_gRNA-1_Foward       | caccgCTGGAGCGGCTGGGTCTCGC                                   |
| hUBE2E3_gRNA-1_Reverse      | aaacGCGAGACCCAGCCGCTCCAGc                                   |
| hUBE2E3_gRNA-2_Foward       | caccgGGTGCTGGGGCTCTCATCAT                                   |
| hUBE2E3_gRNA-2_Reverse      | aaacATGATGAGAGCCCCAGCACCCc                                  |
| dsRNAi_UbcD2_Foward(+T7)    | taatacgactcactatagggTTCGCTTAGCAACCGAAAAC                    |
| dsRNAi_UbcD2_Reverse(+T7)   | taatacgactcactatagggCGCATTACGCATTAATAATAGGC                 |
| dsRNAi_Calypso_Foward(+T7)  | taatacgactcactatagggATGCCTTGTTCCACACATCC                    |
| dsRNAi_Calypso_Reverse(+T7) | taatacgactcactatagggGAAATGGCCTCCTCATCCTT                    |
| dsRNAi_Luc_Foward(+T7)      | taatacgactcactatagggTGCTGGACAGCTTCATCAAC                    |
| dsRNAi_Luc_Reverse(+T7)     | taatacgactcactatagggATGTCCTCCTCGATGTCTGG                    |
| Asx_K325R_Foward            | GGATCCCTGGcgCCTGAAACACTTTGAGCCCTT                           |
| Asx_K325R_Reverse           | AGTGTTCAGgCGCCAGGGATCCAACCTGTTCT                            |
| DEUBAD(Asx)_Foward          | GCGGCCGCcATGAGCGTTAAACCGCGT                                 |
| DEUBAD(Asx)_Reverse         | GGCGGCCCCCTGCAGGTTAATTTTTACA                                |
| Flag_Calypso_Foward         | actcGGATCCatgGACTACAAAGACGATGACGACAAGAACGCTGCTGGAGGAGGTAGTG |
| Flag_Calypso_Reverse        | gagtGATATCggcgcgccCTACTTCCGTTTTCTGCACTTGT                   |

**Supplementary Table 5: List of antibodies used**

| <b>Antibody</b>                                      | <b>Source</b>          | <b>Catalogue number</b> | <b>Dilution</b> |
|------------------------------------------------------|------------------------|-------------------------|-----------------|
| <b>Mouse monoclonal anti-BAP1 (C4)</b>               | Santa Cruz             | sc-28383                | 1:1000          |
| <b>Rabbit polyclonal anti-BAP1 (H300)</b>            | Santa Cruz             | sc-28236                | 1:1000          |
| <b>Rabbit polyclonal anti-YY1 (H414)</b>             | Santa Cruz             | sc-1703                 | 1:1000          |
| <b>Mouse monoclonal anti-CDC6 (180)</b>              | Santa Cruz             | sc-9964                 | 1:1000          |
| <b>Mouse monoclonal anti-Tubulin (B-5-1-2)</b>       | Santa Cruz             | sc-SC-23948             | 1:2000          |
| <b>Rabbit polyclonal anti-ASXL2</b>                  | Bethyl Laboratories    | A302-037A               | 1:2000          |
| <b>Mouse monoclonal anti-Flag (M2)</b>               | Sigma-Aldrich          | F3165                   | 1:2000          |
| <b>Rabbit polyclonal anti-GST</b>                    | Sigma-Aldrich          | G7781                   | 1:20000         |
| <b>Mouse monoclonal anti-MYC</b>                     | Covance                | 9E10                    | 1:1000          |
| <b>Rabbit polyclonal anti-H2Aub K119</b>             | Cell signaling         | D27C4                   | 1:30000         |
| <b>Mouse monoclonal anti-MBP</b>                     | Cell signaling         | E8038                   | 1:5000          |
| <b>Mouse anti-V5</b>                                 | Abcam                  | ab27671                 | 1:2000          |
| <b>Mouse anti-Myc (home-made)</b>                    | Mashtalir et al., 2014 | N/A                     | 1:1000          |
| <b>Mouse anti-HA (home-made)</b>                     | Mashtalir et al., 2014 | N/A                     | 1:1000          |
| <b>Rabbit polyclonal anti-UBE2E1</b>                 | Boston Biochem         | A-630                   | 1:1000          |
| <b>Rabbit polyclonal anti-UBE2E2</b>                 | Bethyl Laboratories    | A303-485A               | 1:2000          |
| <b>Mouse polyclonal anti-UBE2E3</b>                  | Abcam                  | ab66257                 | 1:2000          |
| <b>Mouse anti-Ubx</b>                                | DSHB                   | FP3.38                  | 1:200           |
| <b>Rabbit polyclonal anti-UBE2E1/UbcH6 (for IHC)</b> | Novus Biologicals      | NBP1-78983              | 1:600           |
| <b>Mouse monoclonal anti-UBE2E3 (7E8) (for IHC)</b>  | Novus Biologicals      | NBP2-03819              | 1:200           |
| <b>Rabbit polyclonal anti-H3</b>                     | Abcam                  | ab1791                  | 1:50000         |
| <b>Rabbit polyclonal anti-UBE2O</b>                  | Novus Biologicals      | NBP1-32020              | 1:2000          |
| <b>Anti-mouse Alexa Fluor® 594</b>                   | Life Technologies      | A11005                  | 1:1000          |
| <b>anti-mouse Alexa Fluor® 488</b>                   | Life Technologies      | A11029                  | 1:1000          |
| <b>Anti-rabbit Alexa Fluor® 488</b>                  | Life Technologies      | A11008                  | 1:1000          |
| <b>anti-rabbit Alexa Fluor® 594</b>                  | Life Technologies      | A11012                  | 1:1000          |

**Supplementary Table 6: List of commercial enzymes used for ubiquitination assays**

| <b>Recombinant Enzyme</b>                | <b>Source</b>  | <b>Catalogue number</b> |
|------------------------------------------|----------------|-------------------------|
| UBE1                                     | Boston Biochem | E-305                   |
| UbcH5a/UBE2D1                            | Boston Biochem | E2-616                  |
| UbcH5b/UBE2D2                            | Boston Biochem | E2-622                  |
| His6-UbcH6/UBE2E1                        | Boston Biochem | E2-630                  |
| UbcH7/UBE2L3                             | Boston Biochem | E2-640                  |
| UbcH8/UBE2L6                             | Boston Biochem | E2-644                  |
| His6-UBE2E3                              | Boston Biochem | E2-678                  |
| His6-UbcH10/UBE2C                        | Boston Biochem | E2-650                  |
| His6-UBE2W Isoform 1                     | Boston Biochem | E2-740                  |
| His6-UBE2S                               | Boston Biochem | E2-690                  |
| His6-UBE2F                               | Boston Biochem | E2-690                  |
| UBE2K/E2-25K                             | Boston Biochem | E2-603                  |
| UBE2M/Ubc12                              | Boston Biochem | E2-656                  |
| His6-UbcH3/Cdc34                         | Boston Biochem | E2-610                  |
| His6-UBE2T                               | Boston Biochem | E2-695                  |
| His6-UBE2N/Ubc13                         | Boston Biochem | E2-660                  |
| His6-UBE2N (Ubc13)/UBE2V1 (Uev1) Complex | Boston Biochem | E2-664                  |
| His6 UBE2N/UBE2V2 Complex                | Boston Biochem | E2-666                  |
| UbcH2/UBE2H                              | Boston Biochem | E2-607                  |
| His6-HR6A/UBE2A                          | Boston Biochem | E2-612                  |
| His6-HR6B/UBE2B                          | Boston Biochem | E2-613                  |
| UBE2I (Ubc9)                             | Boston Biochem | E2-645                  |
| His6-Uev1a/UBE2V1                        | Boston Biochem | E2-662                  |
| His6-Use1/UBE2Z                          | Boston Biochem | E2-677                  |
| His6-UBE2G2                              | Boston Biochem | E2-680                  |
| His6-UBE2G1/E2-17K                       | Boston Biochem | E2-700                  |
| His6-UBE2D4 (UbcH5D)                     | Boston Biochem | E2-705                  |
| His6-UBE2J2                              | Boston Biochem | E2-710                  |
| His6-UBE2R2/CDC34B                       | Boston Biochem | E2-715                  |
| His6-UBE2Q1-2                            | Boston Biochem | E2-720                  |
| His6-UBE2Q2-1                            | Boston Biochem | E2-745                  |
| His6-UBE2J1                              | Boston Biochem | E2-750                  |

**Supplementary Table 7: Characteristics of the human patient's samples used in the study**

| <b>ID numbers</b> | <b>Age</b> | <b>Gender</b> | <b>Genotype (WT or BAP1 mutant)</b> | <b>MM Diagnosis (Primary vs. Metastatic)</b> | <b>Type of Therapy</b>                     |
|-------------------|------------|---------------|-------------------------------------|----------------------------------------------|--------------------------------------------|
| <b>MVB0020</b>    | 31         | Female        | WT                                  | Primary and metastatic                       | Surgery and chemotherapy                   |
| <b>MVB0061</b>    | 78         | Male          | WT                                  | Primary                                      | Surgery                                    |
| <b>MVB0077</b>    | 84         | Male          | WT                                  | Primary                                      | Talc Pleurodesis                           |
| <b>MVB0428</b>    | 66         | Female        | WT                                  | Primary                                      | Surgery and chemotherapy                   |
| <b>MVB0436</b>    | 32         | Male          | WT                                  | Primary                                      | Surgery and chemotherapy                   |
| <b>MVB0453</b>    | 34         | Female        | WT                                  | Primary                                      | Surgery and chemotherapy                   |
| <b>MVB0456</b>    | 23         | Female        | WT                                  | Primary                                      | Surgery                                    |
| <b>MVB0469</b>    | 46         | Female        | WT                                  | Primary                                      | Surgery and chemotherapy                   |
| <b>MVB0479</b>    | 73         | Male          | WT                                  | Primary                                      | Surgery and chemotherapy                   |
| <b>MVB0489</b>    | 43         | Male          | WT                                  | Primary                                      | Surgery and chemotherapy                   |
| <b>MVB0026</b>    | 85         | Male          | BAP1 mutant                         | Primary                                      | Talc Pleurodesis and radiation             |
| <b>MVB0029</b>    | 73         | Male          | BAP1 mutant                         | Primary and metastatic                       | Surgery                                    |
| <b>MVB0389</b>    | 60         | Male          | BAP1 mutant                         | Primary                                      | Surgery and chemotherapy                   |
| <b>MVB0405</b>    | 67         | Male          | BAP1 mutant                         | Primary                                      | Surgery and radiation                      |
| <b>MVB0409</b>    | 63         | Male          | BAP1 mutant                         | Primary                                      | Surgery and chemotherapy                   |
| <b>MVB0432</b>    | 77         | Male          | BAP1 mutant                         | Primary                                      | Chemotherapy                               |
| <b>MVB0447</b>    | 51         | Female        | BAP1 mutant                         | Primary and metastatic                       | Surgery and chemotherapy                   |
| <b>MVB0451</b>    | 71         | Male          | BAP1 mutant                         | Primary                                      | Chemotherapy                               |
| <b>MVB0471</b>    | 59         | Male          | BAP1 mutant                         | Primary and metastatic                       | Surgery and chemotherapy                   |
| <b>MVB0491</b>    | 68         | Female        | BAP1 mutant                         | Primary                                      | Surgery, chemotherapy and talc pleurodesis |
